# Supplementary material for: Principal elementary mode analysis (PEMA)
Source: Royal Society of Chemistry journal article supplement (doi:10.1039/c5mb00828j), 2016-01-22
Supplement: c5mb00828j1.xlsx [file c5mb00828j1.xlsx]

## Sheet: E.coli EMs
			Elementary Modes
	Reaction	React\EMs	1	2	3	4	5	6	7	8	9	10	11	12	13	14	15	16	17	18	19	20	21	22	23	24	25	26	27	28	29	30	31	32	33	34	35	36	37	38	39	40	41	42	43	44	45	46	47
	Glucose + PEP -> G6P + PYR	1	3	9	3	12	3	3	3	3	3	3	3	3	2	3	3	2	3	3	3	2	3	2	5	5	3	5	5	3	3	3	2	3	2	3	2	3	2	3	2	3	3	1.5	2	2	1	1	2
	G6P <-> F6P	2	0	0	0	0	0	0	0	0	0	0	0	0	-1	0	-6	0	0	0	0	-4	0	-4	0	0	0	0	0	0	2	2	2	1.5	1	3	2	3	2	3	2	3	1.5	1.5	2	1	1	1	0
	F6P -> F1,6P	3	2	6	2	1	2	2	2	2	2	2	2	2	0	2	0	1	1	1	1.5	0	2	0	2	2	2	2	2	2	2	2	2	1.5	1	3	2	3	2	1.5	1	3	1.5	1.5	2	1	1	1	1
	F1,6P -> DHAP + G3P	4	2	6	2	1	2	2	2	2	2	2	2	2	0	2	0	1	1	1	1.5	0	2	0	2	2	2	2	2	2	2	2	2	1.5	1	3	2	3	2	1.5	1	3	1.5	1.5	2	1	1	1	1
	DHAP -> G3P	5	2	6	2	1	2	2	2	2	2	2	2	2	0	2	0	1	1	1	1.5	0	2	0	2	2	2	2	2	2	2	2	2	1.5	1	3	2	3	2	1.5	1	3	1.5	1.5	2	1	1	1	1
	G3P -> 3PG	6	5	15	5	6	3	5	5	5	5	3	5	5	1	5	3	2	3	3	3	2	5	2	5	5	5	5	5	5	3	3	4	3	2	6	4	3	2	3	2	6	3	3	4	2	2	2	2
	3PG <-> PEP	7	5	15	3	6	3	3	5	5	5	3	5	5	1	5	3	2	3	3	3	2	5	2	5	5	5	5	5	5	3	3	4	3	2	3	2	3	2	3	2	6	3	3	4	2	2	2	2
	PEP -> PYR	8	0	0	0	0	0	0	0	0	0	0	0	0	0	0	0	0	0	0	0	0	0	0	0	0	0	0	0	2	0	0	0	0	0	0	0	0	0	0	0	0	0	1.5	0	0	1	0	0
	PYR -> AcCoA + CO2	9	3	9	3	12	3	3	5	3	5	3	0	5	2	0	3	2	3	3	3	2	3	2	5	5	3	5	5	5	3	3	2	3	2	3	2	3	2	3	2	3	3	3	2	2	2	2	2
	G6P -> 6PG	10	3	9	3	12	3	3	3	3	3	3	3	3	3	3	9	2	3	3	3	6	3	6	3	5	3	5	3	3	1	1	0	1.5	1	0	0	0	0	0	0	0	0	0	0	0	0	0	2
	6PG -> Ru5P + CO2	11	3	9	3	12	3	3	3	3	3	3	3	3	3	3	9	2	3	3	3	6	3	6	3	5	3	5	3	3	1	1	0	1.5	1	0	0	0	0	0	0	0	0	0	0	0	0	0	2
	Ru5P -> X5P	12	2	6	2	8	2	2	2	2	2	2	2	2	2	2	6	1	2	2	1.5	4	2	4	2	2	2	2	2	2	0	0	0	0	0	0	0	0	0	0	0	0	0	0	0	0	0	0	1
	Ru5P -> R5P	13	1	3	1	4	1	1	1	1	1	1	1	1	1	1	3	1	1	1	1.5	2	1	2	1	3	1	3	1	1	1	1	0	1.5	1	0	0	0	0	0	0	0	0	0	0	0	0	0	1
	R5P + X5P <-> S7P + G3P	14	1	3	1	4	1	1	1	1	1	1	1	1	1	1	3	1	1	1	1.5	2	1	2	1	1	1	1	1	1	1	1	0	0	0	0	0	0	0	0	0	0	0	0	0	0	0	0	1
	S7P + G3P <-> E4P + F6P	15	1	3	1	4	1	1	1	1	1	1	1	1	1	1	3	1	1	1	1.5	2	1	2	1	1	1	1	1	1	1	1	0	0	0	0	0	0	0	0	0	0	0	0	0	0	0	0	1
	X5P + E4P <-> F6P + G3P	16	1	3	1	4	1	1	1	1	1	1	1	1	1	1	3	0	1	1	0	2	1	2	1	1	1	1	1	1	-1	-1	0	0	0	0	0	0	0	0	0	0	0	0	0	0	0	0	0
	AcCoA + OAA -> CIT	17	1.5	8	1.5	6	1.5	2	0	1.5	0	2	0	0	1	0	2	1	2	1.5	2	1	2	1	3.33333	3.33333	1.5	2.5	2.5	2.5	2	1.5	1	2	1	2	1	2	1	2	1	2	2	2	1	1	1	0	1
	CIT -> ICT	18	1.5	8	1.5	6	1.5	2	0	1.5	0	2	0	0	1	0	2	1	2	1.5	2	1	2	1	3.33333	3.33333	1.5	2.5	2.5	2.5	2	1.5	1	2	1	2	1	2	1	2	1	2	2	2	1	1	1	0	1
	ICT -> 2-KG + CO2	19	0	7	0	0	0	1	0	0	0	1	0	0	0	0	1	0	1	0	1	0	1	0	1.66667	1.66667	0	0	0	0	1	0	0	1	0	1	0	1	0	1	0	1	1	1	0	0	0	0	0
	2-KG -> SUC + CO2	20	0	0	0	0	0	0	0	0	0	0	0	0	0	0	0	0	0	0	0	0	0	0	0	0	0	0	0	0	0	0	0	0	0	0	0	0	0	0	0	0	0	0	0	0	0	0	0
	SUC -> FUM	21	1.5	1	1.5	6	1.5	1	0	1.5	0	1	0	0	1	0	1	1	1	1.5	1	1	1	1	1.66667	1.66667	1.5	2.5	2.5	2.5	1	1.5	1	1	1	1	1	1	1	1	1	1	1	1	1	1	1	0	1
	FUM -> MAL	22	1.5	1	1.5	6	1.5	1	0	1.5	0	1	0	0	1	0	1	1	1	1.5	1	1	1	1	1.66667	1.66667	1.5	2.5	2.5	2.5	1	1.5	1	1	1	1	1	1	1	1	1	1	1	1	1	1	1	0	1
	MAL <-> OAA	23	3	2	3	12	3	2	-2	3	-2	2	-2	-2	2	-2	2	2	2	3	2	2	2	2	3.33333	3.33333	3	5	5	5	2	3	2	2	2	2	2	2	2	2	2	2	2	2	2	2	2	-1	2
	PEP + CO2 <-> OAA	24	-1.5	6	0	-6	0	0	2	2	2	0	2	2	-1	2	0	-1	0	0	0	0	0	-1	0	0	0	0	0	0	0	0	-1	0	0	0	0	0	0	0	0	0	0	0	0	0	0	1	0
	MAL -> PYR + CO2	25	0	0	0	0	0	0	2	0	2	0	2	2	0	2	0	0	0	0	0	0	0	0	0	0	0	0	0	0	0	0	0	0	0	0	0	0	0	0	0	0	0	0	0	0	0	1	0
	ICT -> Glyoxylate + SUC	26	1.5	1	1.5	6	1.5	1	0	1.5	0	1	0	0	1	0	1	1	1	1.5	1	1	1	1	1.66667	1.66667	1.5	2.5	2.5	2.5	1	1.5	1	1	1	1	1	1	1	1	1	1	1	1	1	1	1	0	1
	Glyoxylate + AcCoA -> MAL	27	1.5	1	1.5	6	1.5	1	0	1.5	0	1	0	0	1	0	1	1	1	1.5	1	1	1	1	1.66667	1.66667	1.5	2.5	2.5	2.5	1	1.5	1	1	1	1	1	1	1	1	1	1	1	1	1	1	1	0	1
	AcCoA -> Acetate	28	0	0	0	0	0	0	0	0	5	0	0	0	0	0	0	0	0	0	0	0	0	0	0	0	0	0	0	0	0	0	0	0	0	0	0	0	0	0	0	0	0	0	0	0	0	0	0
	PYR -> Lactate	29	0	0	0	0	0	0	0	0	0	0	0	0	0	5	0	0	0	0	0	0	0	0	0	0	0	0	0	0	0	0	0	0	0	0	0	0	0	0	0	0	0	0	0	0	0	0	0
	AcCoA -> Ethanol	30	0	0	0	0	0	0	5	0	0	0	0	0	0	0	0	0	0	0	0	0	0	0	0	0	0	0	0	0	0	0	0	0	0	0	0	0	0	0	0	0	0	0	0	0	0	2	0
	G6P -> (Cell synthesis)	31	0	0	0	0	0	0	0	0	0	0	0	0	0	0	0	0	0	0	0	0	0	0	2	0	0	0	2	0	0	0	0	0	0	0	0	0	0	0	0	0	1.5	0	0	1	0	0	0
	F6P -> (Cell synthesis)	32	0	0	0	7	0	0	0	0	0	0	0	0	1	0	0	0	1	1	0	0	0	0	0	0	0	0	0	0	0	0	0	0	0	0	0	0	0	1.5	1	0	0	0	0	0	0	0	0
	R5P -> (Cell synthesis)	33	0	0	0	0	0	0	0	0	0	0	0	0	0	0	0	0	0	0	0	0	0	0	0	2	0	2	0	0	0	0	0	1.5	1	0	0	0	0	0	0	0	0	0	0	0	0	0	0
	E4P -> (Cell synthesis)	34	0	0	0	0	0	0	0	0	0	0	0	0	0	0	0	1	0	0	1.5	0	0	0	0	0	0	0	0	0	2	2	0	0	0	0	0	0	0	0	0	0	0	0	0	0	0	0	1
	G3P -> (Cell synthesis)	35	0	0	0	0	2	0	0	0	0	2	0	0	0	0	0	0	0	0	0	0	0	0	0	0	0	0	0	0	0	0	0	0	0	0	0	3	2	0	0	0	0	0	0	0	0	0	0
	3PG -> (Cell synthesis)	36	0	0	2	0	0	2	0	0	0	0	0	0	0	0	0	0	0	0	0	0	0	0	0	0	0	0	0	0	0	0	0	0	0	3	2	0	0	0	0	0	0	0	0	0	0	0	0
	PEP -> (Cell synthesis)	37	3.5	0	0	0	0	0	0	0	0	0	0	0	0	0	0	1	0	0	0	0	2	1	0	0	2	0	0	0	0	0	3	0	0	0	0	0	0	0	0	3	0	0	2	0	0	0	0
	PYR -> (Cell synthesis)	38	0	0	0	0	0	0	0	0	0	0	5	0	0	0	0	0	0	0	0	0	0	0	0	0	0	0	0	0	0	0	0	0	0	0	0	0	0	0	0	0	0	0	0	0	0	0	0
	AcCoA -> (Cell synthesis)	39	0	0	0	0	0	0	0	0	0	0	0	5	0	0	0	0	0	0	0	0	0	0	0	0	0	0	0	0	0	0	0	0	0	0	0	0	0	0	0	0	0	0	0	0	0	0	0
	OAA -> (Cell synthesis)	40	0	0	1.5	0	1.5	0	0	3.5	0	0	0	0	0	0	0	0	0	1.5	0	1	0	0	0	0	1.5	2.5	2.5	2.5	0	1.5	0	0	1	0	1	0	1	0	1	0	0	0	1	1	1	0	1
	2KG -> (Cell synthesis)	41	0	7	0	0	0	1	0	0	0	1	0	0	0	0	1	0	1	0	1	0	1	0	1.66667	1.66667	0	0	0	0	1	0	0	1	0	1	0	1	0	1	0	1	1	1	0	0	0	0	0
	CO2 -> (Evolution)	42	7.5	19	6	30	6	7	8	4	8	7	3	8	6	3	13	5	7	6	7	8	7	9	9.66667	11.6667	6	10	8	8	5	4	3	5.5	3	4	2	4	2	4	2	4	4	4	2	2	2	2	4
[truncated: 208 more columns]

## Sheet: E.coli fluxes
	Data from Ishii et al. 2007	Observations ID	KO01	KO02	KO03	KO05	KO06	KO07	KO08	KO09	KO10	KO11	KO12	KO13	KO14	KO20	KO22	KO23	KO24	GR01	RF03	RF05	RF06
		gene knockouts / wild type (WT)	galM	glk	pgm	pfkA	pfkB	fbp	fbaB	gapC	gpmA	gpmB	pykA	pykF	ppsA	rpiB	tktB	talA	talB	WT, 0.1h-1	WT, 0.2h-1	WT, 0.2h-1	WT, 0.2h-1
	Reaction number	React\Obs	1	2	3	4	5	6	7	8	9	10	11	12	13	14	15	16	17	18	19	20	21
	Glucose + PEP -> G6P + PYR	1	303.819	314.342	305.872	271.859	283.755	270.479	275.884	299.028	269.603	333.15	282.121	280.48	299.797	414.785	296.876	280.355	293.525	133.809	327.582	285.625	266.933
	G6P <-> F6P	2	194.502	272.431	238.724	229.451	147.223	229.095	201.814	187.021	222.932	291.839	210.129	130.46	202.726	210.711	255.016	238.817	251.844	83.1959	285.927	228.986	159.242
	F6P -> F1,6P	3	246.316	279.312	262.487	236.517	217.436	235.587	230.043	240.562	232.926	298.502	236.776	209.249	246.454	325.743	261.844	245.296	258.595	107.259	292.842	245.8	209.948
	F1,6P -> DHAP + G3P	4	246.316	279.312	262.487	236.517	217.436	235.587	230.043	240.562	232.926	298.502	236.776	209.249	246.454	325.743	261.844	245.296	258.595	107.259	292.842	245.8	209.948
	DHAP -> G3P	5	246.316	279.312	262.487	236.517	217.436	235.587	230.043	240.562	232.926	298.502	236.776	209.249	246.454	325.743	261.844	245.296	258.595	107.259	292.842	245.8	209.948
	G3P -> 3PG	6	511.854	555.619	530.126	470.043	463.168	467.928	467.579	501.314	464.245	593.673	480.246	451.304	508.178	702.368	520.423	487.243	513.962	223.539	582.424	493.151	438.71
	3PG <-> PEP	7	482.079	526.071	500.456	440.139	433.373	438.175	437.783	471.711	434.589	564.023	450.624	421.573	478.498	672.503	490.736	457.525	484.316	209.89	552.614	463.446	409.08
	PEP -> PYR	8	167.623	160.192	153.894	115.553	138.158	154.349	123.977	161.861	109.739	183.542	143.992	129.759	104.35	217.451	119.641	109.369	121.742	70.8078	158.258	131.219	130.41
	PYR -> AcCoA + CO2	9	426.942	413.552	398.594	325.972	368.87	384.318	338.893	430.011	318.142	455.726	364.893	369.74	342.989	572.142	355.36	328.651	354.214	181.944	424.91	355.72	336.218
	G6P -> 6PG	10	105.064	37.5105	62.8659	38.0575	132.275	37.0556	69.6551	107.521	42.3573	36.9796	67.4777	145.533	92.5744	199.511	37.4064	37.0517	37.2776	48.6062	37.3967	52.3551	103.421
	6PG -> Ru5P + CO2	11	105.064	37.5105	62.8659	38.0575	132.275	37.0556	69.6551	107.521	42.3573	36.9796	67.4777	145.533	92.5744	199.511	37.4064	37.0517	37.2776	48.6062	37.3967	52.3551	103.421
	Ru5P -> X5P	12	53.9401	9.07821	25.9013	9.24047	72.1986	8.65531	30.4355	55.6342	12.151	8.66189	28.9033	81.0335	45.827	117.106	8.90627	8.72184	8.80574	24.9996	8.87747	18.8141	52.8421
	Ru5P -> R5P	13	51.1237	28.4291	36.9616	28.817	60.0766	28.4002	39.2196	51.8873	30.2063	28.3177	38.5744	64.4992	46.7474	82.4053	28.5001	28.3298	28.4719	23.6066	28.516	33.5409	50.5785
	R5P + X5P <-> S7P + G3P	14	31.3754	8.9399	17.3858	8.97133	40.4975	8.65531	19.6319	32.1515	10.5253	8.66189	18.8259	44.8656	27.2606	62.9104	8.90627	8.70501	8.80574	14.5076	8.86109	13.8328	30.8254
	S7P + G3P <-> E4P + F6P	15	31.3754	8.9399	17.3858	8.97133	40.4975	8.65531	19.6319	32.1515	10.5253	8.66189	18.8259	44.8656	27.2606	62.9104	8.90627	8.70501	8.80574	14.5076	8.86109	13.8328	30.8254
	X5P + E4P <-> F6P + G3P	16	22.5647	0.138311	8.51549	0.271859	31.7011	0	10.8036	23.4797	1.6284	0	10.0802	36.1707	18.5665	54.1999	0	0.0140177	0	10.4933	0.0163791	4.97844	22.0166
	AcCoA + OAA -> CIT	17	265.152	308.86	283.287	221.565	216.301	220.981	220.939	254.317	217.02	347.142	233.39	204.201	261.145	454.326	273.72	240.25	266.814	109.935	335.1	246.086	192.064
	CIT -> ICT	18	265.152	308.86	283.287	221.565	216.301	220.981	220.939	254.317	217.02	347.142	233.39	204.201	261.145	454.326	273.72	240.25	266.814	109.935	335.1	246.086	192.064
	ICT -> 2-KG + CO2	19	185.087	285.894	249.647	199.533	145.453	139.329	184.646	160.557	197.859	320.18	183.706	120.562	261.145	419.472	273.72	233.709	261.31	75.5273	327.186	218.423	129.591
	2-KG -> SUC + CO2	20	161.085	261.69	225.483	175.338	121.334	115.256	160.644	136.336	173.864	296.193	159.726	96.4403	237.161	395.414	249.673	209.599	237.241	64.4211	302.944	194.431	105.567
	SUC -> FUM	21	241.151	284.656	259.123	197.369	192.182	196.908	196.937	230.096	193.025	323.155	209.41	180.079	237.161	430.269	249.673	216.139	242.745	98.8288	310.859	222.093	168.04
	FUM -> MAL	22	241.151	284.656	259.123	197.369	192.182	196.908	196.937	230.096	193.025	323.155	209.41	180.079	237.161	430.269	249.673	216.139	242.745	98.8288	310.859	222.093	168.04
	MAL <-> OAA	23	304.646	307.619	292.76	219.403	255.065	257.942	233.226	293.732	212.188	350.117	259.097	243.072	237.161	464.248	249.673	222.632	248.251	127.811	318.773	249.753	230.51
	PEP + CO2 <-> OAA	24	0.00303819	40.8488	29.9816	41.8526	0.678175	2.52897	27.1635	0.053825	44.4656	36.6698	13.7929	0.675957	63.5571	29.4829	63.5314	57.1475	58.1883	0.323818	55.9641	35.7488	1.05972
	MAL -> PYR + CO2	25	16.5703	0	0.00305872	0	7.965	20.6213	0.00275884	30.1211	0	0	0	20.6461	0	0.879344	0	0.0448568	0	5.4273	0	0	0.00266933
	ICT -> Glyoxylate + SUC	26	80.0625	22.9659	33.6398	22.0341	70.848	81.6521	36.2925	93.7602	19.1634	26.9618	49.6844	83.6392	0	34.8544	0	6.53787	5.50652	34.409	7.91438	27.6599	62.473
	Glyoxylate + AcCoA -> MAL	27	80.0625	22.9659	33.6398	22.0341	70.848	81.6521	36.2925	93.7602	19.1634	26.9618	49.6844	83.6392	0	34.8544	0	6.53787	5.50652	34.409	7.91438	27.6599	62.473
	AcCoA -> Acetate	28	0	0	0	0	0	0	0	0	0	0	0	0	0	0	0	0	0	0	0	0	0
	PYR -> Lactate	29	0	0	0	0	0	0	0	0	0	0	0	0	0	0	0	0	0	0	0	0	0
	AcCoA -> Ethanol	30	0	0	0	0	0	0	0	0.299028	0.269603	0	0	0	0	1.24435	0	0	0	0	0	0.285625	0
	G6P -> (Cell synthesis)	31	4.25347	4.40079	4.28221	4.34974	4.25633	4.32766	4.41414	4.48542	4.31365	4.33095	4.51394	4.48768	4.49696	4.56263	4.45314	4.48568	4.40287	2.00714	4.25856	4.28437	4.27093
	F6P -> (Cell synthesis)	32	2.12674	2.2004	2.14111	2.17487	1.98629	2.16383	2.20707	2.0932	2.15682	1.9989	2.25697	2.24384	2.09858	2.07392	2.07813	2.24284	2.05467	0.936664	1.96549	1.99937	2.13547
	R5P -> (Cell synthesis)	33	19.7483	19.4892	19.5758	19.8457	19.5791	19.7449	19.5877	19.7358	19.681	19.6558	19.7485	19.6336	19.4868	19.4949	19.5938	19.6248	19.6661	9.09903	19.6549	19.7081	19.7531
	E4P -> (Cell synthesis)	34	8.81076	8.80159	8.8703	8.69947	8.79641	8.65531	8.82827	8.67181	8.8969	8.66189	8.74576	8.69488	8.69413	8.71048	8.90627	8.691	8.80574	4.01428	8.84471	8.85437	8.80879
	G3P -> (Cell synthesis)	35	3.34201	3.14342	3.3646	3.2623	3.40506	3.24574	3.3106	3.28931	3.23524	3.3315	3.38545	3.36576	3.29777	3.31828	3.26563	3.36426	3.22877	1.4719	3.27582	3.4275	3.2032
	3PG -> (Cell synthesis)	36	29.7743	29.5482	29.6696	29.9044	29.7943	29.7526	29.7954	29.6038	29.6563	29.6503	29.6227	29.7309	29.6799	29.8645	29.6876	29.7176	29.646	13.6485	29.81	29.705	29.6296
	PEP -> (Cell synthesis)	37	10.6337	10.6876	10.7055	10.8743	10.7827	10.8191	10.7595	10.765	10.7841	10.6608	10.7206	10.6582	10.7927	10.7844	10.6875	10.6535	10.8604	4.95094	10.8102	10.8537	10.6773
	PYR -> (Cell synthesis)	38	61.0677	60.9824	61.1745	61.44	61.0073	61.1281	60.9703	61.0017	61.1999	60.9664	61.2203	61.1447	61.1587	60.9734	61.1564	61.1173	61.0531	28.0999	60.9302	61.1237	61.1277
	AcCoA -> (Cell synthesis)	39	81.7274	81.729	81.6679	82.3731	81.7215	81.6845	81.6615	81.6346	81.6897	81.6217	81.8151	81.9002	81.8447	81.7126	81.6408	81.8636	81.8934	37.6004	81.8955	81.6887	81.6816
	OAA -> (Cell synthesis)	40	39.4965	39.6071	39.4575	39.6913	39.442	39.4899	39.4514	39.4717	39.6316	39.6448	39.497	39.5477	39.5733	39.4046	39.4845	39.53	39.6258	18.1981	39.6374	39.4162	39.5061
	2KG -> (Cell synthesis)	41	24.0017	24.2044	24.1639	24.1954	24.1192	24.0726	24.0019	24.2213	23.9947	23.9868	23.9803	24.1213	23.9838	24.0575	24.0469	24.1105	24.069	11.1062	24.2411	23.9925	24.024
	CO2 -> (Evolution)	42	894.748	957.801	906.606	697.045	775.219	694.048	726.677	864.49	687.757	1072.41	762.009	752.248	870.312	1557.93	852.627	751.911	831.849	375.602	1036.47	785.183	673.739
	Originally flux values in Ishii et al (2007) are multiplied by the specific glucose uptake rate.

## Sheet: P.pastoris EMs
		Elementary Modes
	Reaction number	1	2	3	4	5	6	7	8	9	10	11	12	13	14	15	16	17	18	19	20	21	22	23	24	25	26	27	28	29	30	31	32	33	34	35	36	37	38	39	40	41	42	43	44	45	46	47	48
	1	0	-0.134422	0	-0.134422	0	0	0	0	-0.0745269	-0.134422	-0.0417414	0	-0.0492017	-0.0310969	0	0	0	-0.0310616	0.153817	-0.0212931	0	0	-0.110465	-0.055268	0.448027	0	-0.0212931	0.0460496	0	0.0460496	-0.110465	0	-0.134422	0	-0.0103539	0.0666667	0	0	-0.0313832	0	0	0	0	0.0587031	0.153817	0.368694	0.261256	0.0513811
	2	-0.021708	-0.15613	-0.036352	-0.185418	-0.050996	-0.0440428	-0.0493999	-0.021708	-0.0957297	-0.117384	-0.0870173	-0.046517	-0.0821181	-0.0747208	-0.25652	-0.656186	-0.69913	-0.0723684	-0.297645	-0.716276	-0.681348	-0.25652	-0.763131	-0.714929	-0.003435	-0.69913	-0.716276	-0.0262724	-0.072322	-0.0262724	-0.763131	-0.0666179	-0.206744	-0.666667	-0.690789	-0.6	-0.666667	-0.666667	-0.0938197	-0.333333	-0.666667	-0.571429	-0.666667	0.0369951	0.132109	0.346986	0.239548	0.0003851
	3	-0.021708	-0.15613	-0.036352	-0.185418	-0.050996	-0.0440428	-0.0493999	-0.021708	-0.0957297	-0.117384	-0.0870173	-0.046517	-0.0821181	-0.0747208	-0.25652	-0.656186	-0.69913	-0.0723684	-0.297645	-0.716276	-0.681348	-0.25652	-0.763131	-0.714929	-0.003435	-0.69913	-0.716276	-0.0262724	-0.072322	-0.0262724	-0.763131	-0.0666179	-0.206744	-0.666667	-0.690789	-0.6	-0.666667	-0.666667	-0.0938197	-0.333333	-0.666667	-0.571429	-0.666667	0.0369951	0.132109	0.346986	0.239548	0.0003851
	4	0.153817	0.288239	0.394072	0.288239	0.153817	0.408183	0.403017	0.328174	0.395062	0.288239	0.411113	0.408677	0.40603	0.414356	0.153817	0.0946187	0.30087	0.413887	0	0.283724	0.136061	0.153817	0.236869	0.11851	0	0.30087	0.283724	0.107768	0.153817	0.107768	0.236869	0.412691	0.288239	0.047619	0.137962	0	0.333333	0.133333	0.418171	0.166667	0.333333	0	0.166667	0.095114	0	0	-0.107439	0.102436
	5	0.190228	0.190228	0.350398	0.190228	0.190228	0.352007	0.353617	0.306466	0.299333	0.190228	0.324096	0.352433	0.317282	0.330514	0.190228	0.117016	0.259463	0.330139	0.190228	0.226314	0.117336	0.190228	0.156326	0.0782129	0.386368	0.259463	0.226314	0.190228	0.190228	0.190228	0.156326	0.355895	0.190228	0.047619	0.110046	0.0666667	0.333333	0.133333	0.333557	0.166667	0.333333	0	0.166667	0.190228	0.190228	0.405105	0.190228	0.190228
	6	0.173686	0.173686	0.333856	0.173686	0.173686	0.336936	0.337593	0.289924	0.283176	0.173686	0.30941	0.337344	0.302304	0.316363	0.173686	0.106841	0.248354	0.316005	0.173686	0.216625	0.112312	0.173686	0.142732	0.0714116	0.369826	0.248354	0.216625	0.173686	0.173686	0.173686	0.142732	0.340658	0.173686	0.047619	0.105335	0.0666667	0.333333	0.133333	0.319276	0.166667	0.333333	0	0.166667	0.173686	0.173686	0.388563	0.173686	0.173686
	7	0.148438	0.148438	0.308608	0.148438	0.148438	0.313934	0.313135	0.264676	0.258515	0.148438	0.286994	0.314314	0.279442	0.294765	0.148438	0.0913098	0.231399	0.294431	0.148438	0.201836	0.104645	0.148438	0.121984	0.0610308	0.344578	0.231399	0.201836	0.148438	0.148438	0.148438	0.121984	0.317401	0.148438	0.047619	0.0981437	0.0666667	0.333333	0.133333	0.297479	0.166667	0.333333	0	0.166667	0.148438	0.148438	0.363315	0.148438	0.148438
	8	0.09807	0.09807	0.017985	0.09807	0.09807	0	0.0103293	0.039951	0.0390211	0.09807	0.00946695	0	0.0162853	0	0.09807	0.0603265	0	0	0.09807	0	0	0.09807	0.080592	0.0403218	0	0	0	0.09807	0.09807	0.09807	0.080592	0	0.09807	0	0	0	0	0	0	0	0	0	0	0.09807	0.09807	0.09807	0.09807	0.09807
	9	0.072763	0.072763	0	0.0874069	0.0874069	-0.0109237	0	0.014644	0.0143031	0.05339	0	-0.00972647	0	-0.00912154	0.190169	0.366176	0.325282	-0.0102451	0.28764	0.32631	0.329692	0.190169	0.377208	0.355285	0.18957	0.325282	0.32631	0.09807	0.09807	0.09807	0.377208	0	0.09807	0.333333	0.329918	0.333333	0.333333	0.333333	0	0.166667	0.333333	0.285714	0.333333	0.072763	0.072763	0.072763	0.072763	0.0874069
	10	0.025307	0.025307	0.017985	0.010663	0.010663	0.0109237	0.0103293	0.025307	0.0247179	0.04468	0.00946695	0.00972647	0.0162853	0.00912154	-0.0920992	-0.305849	-0.325282	0.0102451	-0.18957	-0.32631	-0.329692	-0.0920992	-0.296616	-0.314963	-0.18957	-0.325282	-0.32631	0	0	0	-0.296616	0	0	-0.333333	-0.329918	-0.333333	-0.333333	-0.333333	0	-0.166667	-0.333333	-0.285714	-0.333333	0.025307	0.025307	0.025307	0.025307	0.010663
	11	0.014644	0.014644	0.007322	0	0	0.00120899	0	0.014644	0.0143031	0.034017	0	0	0.00663001	0	-0.102762	-0.312408	-0.332442	0.00113388	-0.200233	-0.332556	-0.33293	-0.102762	-0.305379	-0.319347	-0.200233	-0.332442	-0.332556	-0.010663	-0.010663	-0.010663	-0.305379	-0.009822	-0.010663	-0.333333	-0.332955	-0.333333	-0.333333	-0.333333	-0.00920551	-0.166667	-0.333333	-0.285714	-0.333333	0.014644	0.014644	0.014644	0.014644	0
	12	0.014644	0.014644	0.007322	0	0	0.00120899	0	0.014644	0.0143031	0.034017	0	0	0.00663001	0	-0.102762	-0.312408	-0.332442	0.00113388	-0.200233	-0.332556	-0.33293	-0.102762	-0.305379	-0.319347	-0.200233	-0.332442	-0.332556	-0.010663	-0.010663	-0.010663	-0.305379	-0.009822	-0.010663	-0.333333	-0.332955	-0.333333	-0.333333	-0.333333	-0.00920551	-0.166667	-0.333333	-0.285714	-0.333333	0.014644	0.014644	0.014644	0.014644	0
	13	0	0	-0.007322	-0.014644	-0.014644	-0.0121327	-0.0141857	0	0	0.019373	-0.0130014	-0.0133578	-0.00663001	-0.012527	-0.117406	-0.321416	-0.342276	-0.011379	-0.214877	-0.341134	-0.337378	-0.117406	-0.317413	-0.325368	-0.214877	-0.342276	-0.341134	-0.025307	-0.025307	-0.025307	-0.317413	-0.023311	-0.025307	-0.333333	-0.337126	-0.333333	-0.333333	-0.333333	-0.0218479	-0.166667	-0.333333	-0.285714	-0.333333	0	0	0	0	-0.014644
	14	0.064031	0.064031	0.064031	0.064031	0.064031	0.0583365	0.062027	0.064031	0.0625406	0.064031	0.0568488	0.0584072	0.0579795	0.0547746	0.064031	0.0393879	0.0429996	0.0547125	0.064031	0.037506	0.0194455	0.064031	0.0526195	0.0263265	0.064031	0.0429996	0.037506	0.064031	0.064031	0.064031	0.0526195	0.0589808	0.064031	0.047619	0.0182375	0.0666667	0.166667	0.0666667	0.0552788	0.166667	0	0	0	0.064031	0.064031	0.064031	0.064031	0.064031
	15	0.056052	0.056052	0.056052	0.056052	0.056052	0.0510671	0.0542977	0.056052	0.0547473	0.056052	0.0497648	0.0511289	0.0507546	0.047949	0.056052	0.0344797	0.0376414	0.0478947	0.056052	0.0328323	0.0170224	0.056052	0.0460625	0.0230459	0.056052	0.0376413	0.0328323	0.056052	0.056052	0.056052	0.0460625	0.0516311	0.056052	0.047619	0.0159649	0.0666667	0.166667	0.0666667	0.0483904	0.166667	0	0	0	0.056052	0.056052	0.056052	0.056052	0.056052
	16	0	0	0	0	0	0	0	0	0	0	0	0	0	0	0	0	0	0	0	0	0	0	0	0	0	0	0	0	0	0	0	0	0	0.047619	0	0.0666667	0	0	0	0.166667	0	0	0	0	0	0	0	0
	17	0.056052	0.056052	0.056052	0.056052	0.056052	0.0510671	0.0542977	0.056052	0.0547473	0.056052	0.0497648	0.0511289	0.0507546	0.047949	0.056052	0.0344797	0.0376414	0.0478947	0.056052	0.0328323	0.0170224	0.056052	0.0460625	0.0230459	0.056052	0.0376413	0.0328323	0.056052	0.056052	0.056052	0.0460625	0.0516311	0.056052	0	0.0159649	0	0	0	0.0483904	0	0	0	0	0.056052	0.056052	0.056052	0.056052	0.056052
	18	0.029389	0.029389	0.029389	0.029389	0.029389	0.0267754	0.0284692	0.029389	0.0287049	0.029389	0.0260925	0.0268078	0.0266115	0.0251405	0.029389	0.0180783	0.019736	0.025112	0.029389	0.0172145	0.00892512	0.029389	0.0241513	0.0120834	0.029389	0.019736	0.0172145	0.029389	0.029389	0.029389	0.0241513	0.0270711	0.029389	0.047619	0.00837066	0.0666667	0	0	0.0253719	0.166667	0	0	0	0.029389	0.029389	0.029389	0.029389	0.029389
	19	0.029389	0.029389	0.029389	0.029389	0.029389	0.0267754	0.0284692	0.029389	0.0287049	0.029389	0.0260925	0.0268078	0.0266115	0.0251405	0.029389	0.0180783	0.019736	0.025112	0.029389	0.0172145	0.00892512	0.029389	0.0241513	0.0120834	0.029389	0.019736	0.0172145	0.029389	0.029389	0.029389	0.0241513	0.0270711	0.029389	0.047619	0.00837066	0.0666667	0	0	0.0253719	0.166667	0	0	0	0.029389	0.029389	0.029389	0.029389	0.029389
	20	0.029389	0.029389	0.029389	0.029389	0.029389	0.0267754	0.0284692	0.029389	0.0287049	0.029389	0.0260925	0.0268078	0.0266115	0.0251405	0.029389	0.0180783	0.019736	0.025112	0.029389	0.0172145	0.00892512	0.029389	0.0241513	0.0120834	0.029389	0.019736	0.0172145	0.029389	0.029389	0.029389	0.0241513	0.0270711	0.029389	0.047619	0.00837066	0.0666667	0	0	0.0253719	0.166667	0	0	0	0.029389	0.029389	0.029389	0.029389	0.029389
	21	0.051688	0.051688	0.051688	0.051688	0.051688	0.0470912	0.0500703	0.051688	0.0504849	0.051688	0.0458903	0.0471482	0.046803	0.0442159	0.051688	0.0317952	0.0347107	0.0441658	0.051688	0.0302761	0.0156971	0.051688	0.0424762	0.0212517	0.051688	0.0347107	0.0302761	0.051688	0.051688	0.051688	0.0424762	0.0476113	0.051688	0	0.0147219	0	0.166667	0.0666667	0.0446229	0	0	0	0	0.051688	0.051688	0.051688	0.051688	0.051688
	22	0.027449	0.027449	0.027449	0.027449	0.027449	0.0250079	0.0265899	0.027449	0.0268101	0.027449	0.0243701	0.0250382	0.0248548	0.0234809	0.027449	0.0168849	0.0184332	0.0234543	0.027449	0.0160782	0.00833596	0.027449	0.0225571	0.0112857	0.027449	0.0184332	0.0160782	0.027449	0.027449	0.027449	0.0225571	0.0252841	0.027449	0	0.0078181	0	0.166667	0.0666667	0.0236971	0	0	0	0	0.027449	0.027449	0.027449	0.027449	0.027449
	23	0.026663	0.026663	0.026663	0.026663	0.026663	0.0242918	0.0258285	0.026663	0.0260424	0.026663	0.0236723	0.0243212	0.0241431	0.0228086	0.026663	0.0164014	0.0179054	0.0227827	0.026663	0.0156178	0.00809726	0.026663	0.0219111	0.0109626	0.026663	0.0179054	0.0156178	0.026663	0.026663	0.026663	0.0219111	0.0245601	0.026663	0	0.00759423	0	0	0	0.0230185	0	0	0	0	0.026663	0.026663	0.026663	0.026663	0.026663
	24	0.0033301	0.0033301	0.1635	0.0033301	0.0033301	0.181731	0.172568	0.119568	0.116785	0.0033301	0.158162	0.181951	0.148048	0.170634	0.0033301	0.00204847	0.133953	0.170441	0.0033301	0.116839	0.0605769	0.0033301	0.00273661	0.00136918	0.19947	0.133953	0.116839	0.0033301	0.0033301	0.0033301	0.00273661	0.183738	0.0033301	0	0.0568136	0	0	0	0.172205	0	0.333333	0	0	0.0033301	0.0033301	0.218207	0.0033301	0.0033301
	25	0	0	0	0	0	0	0	0	0	0	0	0	0	0	0	0	0	0	0	0	0	0	0	0	0	0	0	0	0	0	0	0	0	0	0	0	0	0	0	0	0.333333	0	0	0	0	0.214877	0	0
	26	0.0033301	0.0033301	0.1635	0.0033301	0.0033301	0.181731	0.172568	0.119568	0.116785	0.0033301	0.158162	0.181951	0.148048	0.170634	0.0033301	0.00204847	0.133953	0.170441	0.0033301	0.116839	0.0605769	0.0033301	0.00273661	0.00136918	0.19947	0.133953	0.116839	0.0033301	0.0033301	0.0033301	0.00273661	0.183738	0.0033301	0	0.0568136	0	0	0	0.172205	0	0	0	0	0.0033301	0.0033301	0.0033301	0.0033301	0.0033301
	27	0.0033301	0.0033301	0.0033301	0.0033301	0.0033301	0.00303394	0.00322588	0.0033301	0.00325259	0.0033301	0.00295657	0.00303762	0.00301538	0.0028487	0.0033301	0.00204847	0.00223631	0.00284547	0.0033301	0.0019506	0.00101131	0.0033301	0.00273661	0.00136918	0.0033301	0.00223631	0.0019506	0.0033301	0.0033301	0.0033301	0.00273661	0.00306745	0.0033301	0	0.000948489	0	0	0	0.00287492	0	0	0	0	0.0033301	0.0033301	0.0033301	0.0033301	0.0033301
	28	0.522511	0.791355	0.995699	0.776711	0.507867	1	1	0.871225	1	0.810728	1	1	1	1	0.405105	0	0.403762	1	0	0.352178	0	0.405105	0.332908	0	0	0.403762	0.352178	0.405105	0.497204	0.405105	0.332908	1	0.766048	0	0	0	0.5	0	1	1	0	0	0	0.405105	0.214877	0	0	0.405105
	29	0.117406	0.38625	0.430424	0.371606	0.102762	0.452225	0.438231	0.349882	0.490792	0.405623	0.485129	0.451562	0.488148	0.485672	0	-0.249195	0	0.486255	-0.405105	0	-0.182592	-3e-08	-2.46534e-08	-0.16656	-0.601245	-2.01463e-08	-1.75724e-08	0	0.0920992	-3e-08	0	0.446176	0.360943	-0.285714	-0.171248	-0.4	0	-0.2	0.480937	0	0	-0.285714	-0.166667	-3e-08	-0.190228	-0.405105	-0.405105	0
	30	0.058119	0.058119	0	0.102051	0.102051	0	0.0141857	0	0	0	0.0130014	0.00363135	0	0.0034055	0.410338	1	1	0	0.70275	1	1	0.410338	1	1	0.60468	1	1	0.13404	0.13404	0.13404	1	0.033133	0.13404	1	1	1	1	1	0.0310534	0.5	1	1	1	0.058119	0.058119	0.058119	0.058119	0.102051
	31	0	0	0	0	0	0	0	0	0	0	0	0	0	0	0	0	0	0	0	0	0	0	0	0	0	0	0	0	0	0	0	0	0	0	0	0	0	0	0	0	0	0.142857	0	0	0	0	0	0
	32	0.058119	0.058119	0	0.102051	0.102051	0	0.0141857	0	0	0	0.0130014	0.00363135	0	0.0034055	0.410338	1	1	0	0.70275	1	1	0.410338	1	1	0.60468	1	1	0.13404	0.13404	0.13404	1	0.033133	0.13404	1	1	1	1	1	0.0310534	0.5	1	0.857143	1	0.058119	0.058119	0.058119	0.058119	0.102051
	33	0.058119	0.058119	0	0.102051	0.102051	0	0.0141857	0	0	0	0.0130014	0.00363135	0	0.0034055	0.410338	1	1	0	0.70275	1	1	0.410338	1	1	0.60468	1	1	0.13404	0.13404	0.13404	1	0.033133	0.13404	1	1	1	1	1	0.0310534	0.5	1	0.857143	1	0.058119	0.058119	0.058119	0.058119	0.102051
	34	0.134422	0	0.054337	0	0.134422	0.0331191	0.0455435	0.076303	0	0	0	0.0331592	0	0	0.134422	0.082688	0.0244119	0	0.288239	0	0.0110397	0.134422	0	0	0.484379	0.0244119	0	0.180472	0.134422	0.180472	0	0.0334849	0	0	0	0.0666667	0	0	0	0	0	0	0	0.193125	0.288239	0.503116	0.395678	0.185803
	35	0.117406	0.38625	0.430424	0.371606	0.102762	0.452225	0.438231	0.349882	0.490792	0.405623	0.485129	0.451562	0.488149	0.485672	3e-08	-0.249195	2.01463e-08	0.486255	-0.405105	1.75724e-08	-0.182592	0	0	-0.16656	-0.601245	0	0	3e-08	0.0920992	0	2.46534e-08	0.446176	0.360943	-0.285714	-0.171248	-0.4	0	-0.2	0.480937	0	0	-0.285714	-0.166667	0	-0.190228	-0.405105	-0.405105	3e-08
	36	0.058119	0.058119	0	0.102051	0.102051	0	0.0141857	0	0	0	0.0130014	0.00363135	0	0.0034055	0.410338	1	1	0	0.70275	1	1	0.410338	1	1	0.60468	1	1	0.13404	0.13404	0.13404	1	0.033133	0.13404	1	1	1	1	1	0.0310534	0.5	1	1	1	0.058119	0.058119	0.058119	0.058119	0.102051
	37	0.290339	0.424761	0.497874	0.439405	0.304983	0.500022	0.507116	0.435636	0.500023	0.405388	0.506522	0.501838	0.500022	0.501723	0.407745	0.500015	0.701897	0.500021	0.351399	0.676103	0.500007	0.407745	0.666474	0.50001	0.302364	0.701897	0.676103	0.269597	0.315646	0.269597	0.666474	0.516589	0.450068	0.5	0.500007	0.5	0.75	0.5	0.515547	0.75	0.5	0.5	0.5	0.231636	0.136522	0.0290835	0.0290835	0.253602
	38	0.216879	0.216879	0.296964	0.216879	0.216879	0.28694	0.294763	0.274998	0.268597	0.216879	0.270155	0.287287	0.268898	0.26942	0.216879	0.13341	0.211502	0.269114	0.216879	0.184481	0.0956466	0.216879	0.178227	0.0891705	0.314949	0.211502	0.184481	0.216879	0.216879	0.216879	0.178227	0.290109	0.216879	0.142857	0.0897047	0.2	0	0	0.2719	0.5	0.333333	0.142857	0	0.216879	0.216879	0.431756	0.216879	0.216879
	39	0	0	0	0	0	0	0	0	0	0	0	0	0	0	0	0	0	0	0	0	0	0	0	0	0	0	0	0	0	0	0	0	0	0	0	0	0	0	0	0	0.333333	0	0	0	0	0.214877	0	0
	40	0	0	0.16017	0	0	0.178697	0.169343	0.116238	0.113532	0	0.155205	0.178913	0.145032	0.167786	0	0	0.131716	0.167595	0	0.114889	0.0595655	0	0	0	0.19614	0.131716	0.114889	0	0	0	0	0.18067	0	0	0.0558651	0	0	0	0.16933	0	0	0	0	0	0	0	0	0
	41	0	0	0	0	0	0	0	0	0	0	0	0	0	0	0	0	0	0	0	0	0	0	0	0	0	0	0	0	0	0	0	0	0	0	0	0	0	0	0	0	0	0	0.166667	0	0	0	0	0
	42	0	0	0	0	0	0	0	0	0	0	0	0	0	0	0	0	0	0	0	0	0	0	0	0	0	0	0	0	0	0	0	0	0	0	0	0	0.166667	0.0666667	0	0	0	0	0	0	0	0	0	0
	43	1	1	1	1	1	0.911067	0.968702	1	0.976724	1	0.887832	0.91217	0.905491	0.855439	1	0.615137	0.671543	0.854469	1	0.585748	0.303689	1	0.821781	0.411153	1	0.671543	0.585748	1	1	1	0.821781	0.921129	1	0	0.284823	0	0	0	0.863313	0	0	0	0	1	1	1	1	1
[truncated: 110 more columns]

## Sheet: P.pastoris fluxes
		Fluxes
	Observations	1	2	3	4	5	6	7	8	9	10	11	12	13	14	15	16	17	18	19	20	21	22	23	24	25	26	27	28	29	30	31	32	33	34	35	36	37	38	39	40	41	42	43
	1	-0.845062	-0.737954	-0.737952	3.90439	3.28823	3.18423	3.02551	0.616529	0.335641	0.280889	0.213852	0.21385	0.121789	2.20025	2.15009	1.79772	0.352379	1.98247	1.98247	1.98247	0.324935	0.172553	0.16762	0.315565	0.294631	0.0209345	0.0209342	17.9754	4.64234	0	0	-6.01684e-08	0	0	4.64234	0	8.98783	7.05122	0.294629	0	0	0	6.28663
	2	-0.710774	-0.620693	-0.620693	3.02758	2.50932	2.42186	2.28835	0.518556	0.282304	0.236252	0.179869	0.179865	0.102433	1.67311	1.63092	1.33455	0.296383	1.48994	1.48994	1.48995	0.273282	0.145126	0.140984	0.186562	0.168949	0.0176087	0.017609	13.7976	3.64827	1.44209e-06	0	1.28165e-06	0	0	3.64828	0	6.89892	5.31939	0.16895	0	0	0	5.28762
	3	-0.583042	-0.509151	-0.509144	3.36386	2.93874	2.86699	2.75748	0.425372	0.231568	0.193802	0.147548	0.147541	0.0840215	2.07339	2.03878	1.79565	0.243127	1.92312	1.92312	1.92312	0.224208	0.11907	0.115653	0.332411	0.317971	0.0144476	0.0144466	16.4041	3.873	0	1.11518e-07	-2.11556e-08	0	0	3.87301	0	8.20213	6.64562	0.317986	0	0	0	4.33745
	4	-0.599145	-0.523227	-0.523236	2.98956	2.55268	2.47894	2.36641	0.437125	0.237965	0.199156	0.151623	0.15161	0.0863363	1.60531	1.56975	1.31991	0.249841	1.45092	1.45092	1.45092	0.230443	0.122377	0.118835	0.399661	0.384822	0.0148514	0.0148447	13.238	3.51279	7.31803e-06	2.24394e-06	5.37179e-06	0	0	3.51281	0	6.61908	5.31118	0.384827	0	0	0	4.4573
	5	-0.83957	-0.733156	-0.733158	3.61424	3.00209	2.89877	2.74107	0.612524	0.33346	0.279063	0.212462	0.212461	0.120999	1.88086	1.83102	1.48094	0.35009	1.6645	1.6645	1.6645	0.322811	0.171423	0.166531	0.353848	0.333054	0.0207997	0.0207997	15.7632	4.3474	4.16049e-07	0	2.32777e-07	0	0	4.3474	0	7.88176	6.13046	0.333055	0	0	0	6.24579
	6	-0.91544	-0.79941	-0.799414	4.68284	4.01536	3.9027	3.73076	0.667876	0.363597	0.304279	0.231662	0.231661	0.131934	2.64971	2.59537	2.21365	0.381729	2.41381	2.41381	2.41381	0.351965	0.186904	0.181572	0.528941	0.506264	0.0226751	0.0226748	21.523	5.48225	1.51009e-06	0	1.35838e-06	0	0	5.48225	0	10.7617	8.62426	0.506262	0	0	0	6.81017
	7	-0.628772	-0.549079	-0.549081	2.76926	2.3108	2.23342	2.11532	0.45873	0.249734	0.208996	0.159118	0.159117	0.090617	1.4627	1.42538	1.16319	0.262188	1.30066	1.30066	1.30066	0.241763	0.128388	0.124719	0.273381	0.257803	0.0155808	0.015578	12.1924	3.31834	1.32645e-06	5.08218e-06	-3.33961e-06	0	0	3.31835	0	6.09631	4.76186	0.257806	0	0	0	4.6776
	8	-0.608738	-0.531559	-0.531554	3.05199	2.60817	2.53326	2.41892	0.444118	0.241787	0.202335	0.154049	0.154055	0.0877403	1.69851	1.66238	1.40855	0.253838	1.54163	1.54163	1.54163	0.234072	0.124299	0.120748	0.353252	0.338174	0.0150768	0.0150785	13.8693	3.58354	3.48884e-06	4.58467e-06	-9.06753e-07	0	0	3.58354	0	6.93477	5.54596	0.338171	0	0	0	4.52853
	9	-0.598544	-0.522708	-0.522719	3.17457	2.7381	2.66445	2.55202	0.436672	0.237712	0.198953	0.151471	0.151454	0.0862491	1.60016	1.56463	1.31505	0.249573	1.44592	1.44592	1.44592	0.230196	0.122239	0.118717	0.590801	0.57599	0.0148202	0.0148235	13.3915	3.69729	0	1.48344e-05	-1.29825e-05	0	0	3.69729	0	6.69587	5.48681	0.576041	0	0	0	4.45265
	10	-0.906017	-0.791204	-0.791204	4.09109	3.43047	3.31897	3.1488	0.660997	0.359848	0.301148	0.229273	0.229268	0.130563	2.20758	2.1538	1.776	0.377799	1.97408	1.97408	1.97408	0.348341	0.184996	0.179716	0.394795	0.372342	0.0224536	0.0224493	18.2687	4.88229	7.9893e-06	0	7.42799e-06	0	0	4.88229	0	9.13453	7.1622	0.372343	0	0	0	6.74009
	11	-0.664398	-0.580193	-0.580195	3.01528	2.53083	2.44907	2.32428	0.484725	0.263884	0.22084	0.168135	0.16813	0.0957496	1.46836	1.42892	1.15188	0.277043	1.29714	1.29714	1.29714	0.255469	0.135664	0.131786	0.455195	0.43874	0.0164606	0.01646	12.509	3.59547	0	0	1.08727e-07	9.38245e-07	0	3.59547	0	6.25462	4.96633	0.438742	0	0	0	4.94263
	12	-0.676688	-0.590916	-0.590921	3.19362	2.70022	2.61695	2.48985	0.493688	0.268769	0.22492	0.171243	0.171245	0.0975266	1.89447	1.8543	1.57213	0.28217	1.72008	1.72008	1.72008	0.260187	0.138168	0.134222	0.187247	0.170481	0.0167646	0.0167651	15.2567	3.78454	0	2.20941e-06	-1.98085e-06	0	0	3.78454	0	7.62845	5.97867	0.170474	0	0	0	5.03408
	13	-0.884848	-0.772723	-0.772735	3.81828	3.17307	3.06418	2.89798	0.645551	0.351434	0.294112	0.223917	0.223909	0.127513	1.90407	1.85155	1.48259	0.368968	1.67606	1.67606	1.67606	0.340235	0.180658	0.175504	0.460219	0.438302	0.0219201	0.0219226	16.1532	4.59103	3.56889e-07	0	3.91823e-07	0	0	4.59103	0	8.07677	6.31372	0.438315	0	0	0	6.58256
	14	-0.915319	-0.799318	-0.799322	4.55697	3.88956	3.77692	3.605	0.667785	0.36354	0.30424	0.23163	0.231625	0.131908	2.62364	2.56931	2.18766	0.381675	2.38778	2.38778	2.38779	0.351932	0.18687	0.181556	0.429305	0.406634	0.0226807	0.0226789	21.2407	5.35629	1.80342e-08	0	-1.51987e-07	0	0	5.35629	0	10.6205	8.44641	0.406624	0	0	0	6.80928
	15	-0.912565	-0.796923	-0.796926	4.07239	3.40698	3.29468	3.12328	0.665777	0.362446	0.303329	0.230936	0.230926	0.131509	2.2425	2.18833	1.80781	0.380523	2.00733	2.00733	2.00733	0.350872	0.186324	0.181009	0.330386	0.307779	0.0226052	0.0226059	18.4664	4.86932	0	0	5.78547e-09	0	0	4.86932	0	9.23334	7.20359	0.307783	0	0	0	6.78881
	16	-0.709314	-0.619407	-0.619406	3.22444	2.70726	2.61997	2.48675	0.517494	0.281727	0.235767	0.1795	0.1795	0.102227	1.67509	1.63299	1.33722	0.295772	1.4923	1.4923	1.4923	0.272733	0.144832	0.140692	0.38384	0.36627	0.0175703	0.017571	14.0048	3.84385	0	2.24829e-07	-2.22412e-07	0	0	3.84385	0	7.00253	5.52236	0.36627	0	0	0	5.27677
	17	-0.84339	-0.736492	-0.736492	3.56121	2.94627	2.84248	2.68407	0.615312	0.334978	0.280333	0.21343	0.213428	0.121548	1.87936	1.8293	1.47762	0.351681	1.66202	1.66202	1.66202	0.324289	0.172205	0.167289	0.296025	0.275135	0.0208925	0.0208932	15.7052	4.2977	4.01794e-06	3.22278e-06	6.15014e-07	0	0	4.2977	0	7.85273	6.06877	0.275131	0	0	0	6.27421
	18	-0.609324	-0.532101	-0.532104	2.61528	2.17099	2.09601	1.98156	0.444542	0.242009	0.202531	0.154196	0.154192	0.0878124	1.30796	1.27179	1.01771	0.254078	1.15093	1.15093	1.15093	0.2343	0.124428	0.120862	0.306088	0.290994	0.0150962	0.0150965	11.09	3.14739	0	1.22625e-06	-1.11698e-06	0	0	3.14739	0	5.54508	4.32722	0.290998	0	0	0	4.53288
	19	-0.90452	-0.777115	-0.774355	4.52856	3.8858	3.77427	3.604	0.66198	0.363626	0.299949	0.229592	0.233972	0.135973	2.61585	2.56211	2.18921	0.378468	2.3902	2.39024	2.39189	0.324948	0.168457	0.178696	0.464995	0.443227	0.0222664	0.0223702	21.146	5.30257	2.0024e-06	0.000358347	-0.000343678	0	0	5.30123	0	10.5713	8.49771	0.44322	0	0	0	6.74784
	20	-0.881095	-0.769427	-0.769423	3.85222	3.20977	3.10134	2.93585	0.642816	0.349947	0.292867	0.22297	0.222967	0.126978	2.06801	2.01571	1.64831	0.367403	1.84093	1.84093	1.84094	0.338796	0.179921	0.174772	0.336411	0.314589	0.0218274	0.0218276	17.1668	4.62164	0	4.54127e-06	-4.15817e-06	0	0	4.62165	0	8.58355	6.68108	0.314596	0	0	0	6.55468
	21	-0.772708	-0.674765	-0.674766	3.5798	3.01639	2.9213	2.77617	0.563744	0.306908	0.256837	0.195543	0.195544	0.111364	1.74671	1.70084	1.37864	0.322204	1.54757	1.54757	1.54757	0.297141	0.157803	0.153272	0.563382	0.544237	0.0191419	0.019143	14.8551	4.25456	0	4.65299e-07	-3.67988e-07	0	0	4.25456	0	7.42768	5.92683	0.544236	0	0	0	5.74838
	22	-0.716257	-0.625483	-0.625489	3.29916	2.77689	2.68875	2.55422	0.522551	0.284481	0.23807	0.181252	0.181253	0.103224	1.73377	1.69125	1.39258	0.298666	1.54918	1.54918	1.54917	0.275421	0.14627	0.142069	0.38843	0.370683	0.017749	0.0177463	14.4387	3.92464	3.46575e-08	0	6.85992e-08	0	0	3.92465	0	7.21948	5.70402	0.370686	0	0	0	5.32836
	23	-0.902126	-0.787802	-0.787804	3.6904	3.03261	2.9216	2.75216	0.658157	0.358299	0.299855	0.228292	0.228284	0.130007	1.82739	1.77384	1.39768	0.376171	1.59492	1.59492	1.59492	0.346867	0.184205	0.178937	0.380673	0.358331	0.0223466	0.0223475	15.583	4.47821	0	3.0915e-06	-2.61512e-06	0	0	4.47823	0	7.79162	6.00689	0.358358	0	0	0	6.71111
	24	-0.623289	-0.544282	-0.544276	2.85942	2.40498	2.32828	2.21121	0.454731	0.247559	0.207171	0.157732	0.157733	0.0898303	1.46044	1.42344	1.16355	0.259895	1.29982	1.29982	1.29982	0.239659	0.127275	0.123628	0.374837	0.359398	0.0154427	0.0154406	12.2634	3.4037	0	0	1.5537e-08	0	0	3.40371	0	6.13179	4.85568	0.359412	0	0	0	4.63681
	25	-0.407748	-0.352289	-0.351472	2.10997	1.81763	1.76738	1.69067	0.298093	0.163245	0.135319	0.103389	0.104688	0.0604278	1.25085	1.22663	1.05768	0.170403	1.14765	1.14765	1.14808	0.150775	0.0790296	0.080729	0.199756	0.189833	0.0100606	0.0100889	10.0317	2.46134	1.27337e-06	0.000105141	-0.000100446	0	0	2.46096	0	5.01539	4.02814	0.18983	0	0	0	3.03895
	26	-0.976667	-0.852879	-0.852864	4.58643	3.87433	3.75413	3.57069	0.712543	0.387923	0.324624	0.247151	0.247154	0.140754	2.36925	2.31128	1.90404	0.407254	2.11756	2.11755	2.11753	0.375684	0.199507	0.193731	0.612216	0.588011	0.0241934	0.0241974	19.8069	5.43929	1.68552e-05	0	1.52422e-05	2.14959e-06	0	5.43929	0	9.90365	7.87574	0.587979	0	0	0	7.26571
