# Supplementary material for: Principal elementary mode analysis (PEMA)
Source: Royal Society of Chemistry journal article supplement (doi:10.1039/c5mb00828j), 2016-01-22
Supplement: c5mb00828j15.xlsx [file c5mb00828j15.xlsx]

## Sheet: Hoja1
	Number of true Ems	PEMA config (R_B)	Mean Explained Variance	Standard deviation Explained Variance	Minimum number of PEMs selected	Mean number of PEMs selected	Maximum number of PEMs selected
	1	1_1	100	0	1	1	1
	1	5_1	100	8.20464e-15	1	1	1
	1	10_1	100	8.20464e-15	1	1	1
	1	20_1	100	8.20464e-15	1	1	1
	1	2_2	100	8.20464e-15	1	1	1
	1	5_2	100	8.20464e-15	1	1	1
	1	10_2	100	8.20464e-15	1	1	1
	1	3_3	100	8.20464e-15	1	1	1
	1	5_3	100	8.20464e-15	1	1	1
	1	4_4	100	8.20464e-15	1	1	1
	2	1_1	100	4.73695e-15	2	2.3	3
	2	5_1	100	4.73695e-15	2	2	2
	2	10_1	100	4.73695e-15	2	2	2
	2	20_1	100	4.73695e-15	2	2	2
	2	2_2	100	4.73695e-15	2	2.1	3
	2	5_2	100	4.73695e-15	2	2	2
	2	10_2	100	4.73695e-15	2	2	2
	2	3_3	100	4.73695e-15	2	2.1	3
	2	5_3	100	4.73695e-15	2	2	2
	2	4_4	100	4.73695e-15	2	2	2
	3	1_1	98.5035	2.90738	3	3.9	5
	3	5_1	99.9333	0.211071	3	3.4	4
	3	10_1	99.9333	0.211071	3	3.4	4
	3	20_1	99.8937	0.233074	3	3.3	4
	3	2_2	99.4289	1.80588	3	3.4	4
	3	5_2	100	4.73695e-15	3	3.3	4
	3	10_2	100	4.73695e-15	3	3.3	4
	3	3_3	100	4.73695e-15	3	3.3	4
	3	5_3	100	4.73695e-15	3	3.3	4
	3	4_4	100	4.73695e-15	3	3.3	4
	4	1_1	99.5655	0.705656	3	4.7	7
	4	5_1	99.5642	0.870999	4	4.5	6
	4	10_1	99.8404	0.306218	4	4.4	5
	4	20_1	99.8944	0.278044	4	4.3	5
	4	2_2	99.7369	0.532092	4	4.4	6
	4	5_2	99.8944	0.278044	4	4.3	5
	4	10_2	99.9119	0.278697	4	4.2	5
	4	3_3	99.8447	0.433002	4	4.2	5
	4	5_3	99.9825	0.0553733	4	4.1	5
	4	4_4	99.9825	0.0553733	4	4.1	5
	5	1_1	99.0448	0.819289	4	5.7	7
	5	5_1	99.513	0.478329	5	5.5	6
	5	10_1	99.6222	0.50643	5	5.5	6
	5	20_1	99.6682	0.444655	5	5.4	6
	5	2_2	99.4219	0.788931	4	5.5	6
	5	5_2	99.6966	0.335865	4	5.2	6
	5	10_2	99.7417	0.2961	4	5	6
	5	3_3	99.9007	0.247922	4	5.3	6
	5	5_3	99.9007	0.247922	4	5.2	6
	5	4_4	99.9785	0.0679152	5	5.3	6
	6	1_1	98.4202	1.50057	4	5.5	7
	6	5_1	98.8421	1.40356	4	5.6	7
	6	10_1	99.1362	1.44077	4	5.7	7
	6	20_1	99.1522	1.44371	4	5.8	7
	6	2_2	98.8726	1.38955	4	5.5	7
	6	5_2	99.5644	0.405992	5	5.9	7
	6	10_2	99.7803	0.19906	5	5.9	7
	6	3_3	99.6635	0.351864	5	6	7
	6	5_3	99.7016	0.311452	5	5.7	7
	6	4_4	99.7841	0.296123	5	5.9	7
	7	1_1	99.1399	0.532253	5	6.3	7
	7	5_1	99.3642	0.407037	5	6	7
	7	10_1	99.3932	0.382252	5	5.9	7
	7	20_1	99.5073	0.223926	5	6	7
	7	2_2	99.2068	0.543244	5	6.1	7
	7	5_2	99.4892	0.299302	5	6.1	7
	7	10_2	99.6171	0.250561	5	6.1	7
	7	3_3	99.5788	0.277723	6	6.2	7
	7	5_3	99.6187	0.257144	6	6.3	7
	7	4_4	99.6786	0.220361	6	6.3	8
	8	1_1	98.9173	0.753485	5	6.6	8
	8	5_1	99.3137	0.342711	5	6.6	8
	8	10_1	99.4518	0.272148	5	6.7	8
	8	20_1	99.5619	0.144286	5	6.8	8
	8	2_2	99.1828	0.472299	5	6.5	8
	8	5_2	99.391	0.239141	5	6.5	8
	8	10_2	99.5427	0.245472	5	6.5	8
	8	3_3	99.3704	0.189534	5	6.6	8
	8	5_3	99.5552	0.209589	5	6.9	8
	8	4_4	99.4179	0.345649	5	6.6	8
	9	1_1	98.9989	0.526651	5	6.8	9
	9	5_1	99.2261	0.426712	5	7	8
	9	10_1	99.3103	0.411024	5	6.7	8
	9	20_1	99.3305	0.413706	5	6.8	8
	9	2_2	99.0509	0.546383	5	6.9	8
	9	5_2	99.4054	0.310942	6	7.1	8
	9	10_2	99.5204	0.323692	5	6.6	8
	9	3_3	99.5515	0.232834	6	7.1	8
	9	5_3	99.4665	0.421218	6	7	8
	9	4_4	99.4665	0.435323	6	6.9	8
	10	1_1	98.4819	2.03583	6	7.1	9
	10	5_1	99.2124	0.525029	6	7.1	8
	10	10_1	99.2923	0.564707	6	7	8
	10	20_1	99.346	0.546536	6	7	8
	10	2_2	99.1558	0.520389	6	6.8	8
	10	5_2	99.2832	0.412622	6	7.1	8
	10	10_2	99.3664	0.336929	6	7	8
	10	3_3	99.4078	0.207844	6	7	8
	10	5_3	99.5195	0.176609	7	7.4	8
	10	4_4	99.5026	0.167169	7	7.4	8
	10 runs per each true number of PEMs
