# Supplementary figures and images for: Principal elementary mode analysis (PEMA)
Source: Royal Society of Chemistry journal article supplement (doi:10.1039/c5mb00828j), 2016-01-22

**Cell Synthesis:**

|                  |   |
|------------------|---|
| $R_{31}$ : G6P   | → |
| $R_{32}$ : F6P   | → |
| $R_{33}$ : R5P   | → |
| $R_{34}$ : E4P   | → |
| $R_{35}$ : G3P   | → |
| $R_{36}$ : 3PG   | → |
| $R_{37}$ : PEP   | → |
| $R_{38}$ : PYR   | → |
| $R_{39}$ : AcCoA | → |
| $R_{40}$ : OAA   | → |
| $R_{41}$ : 2KG   | → |

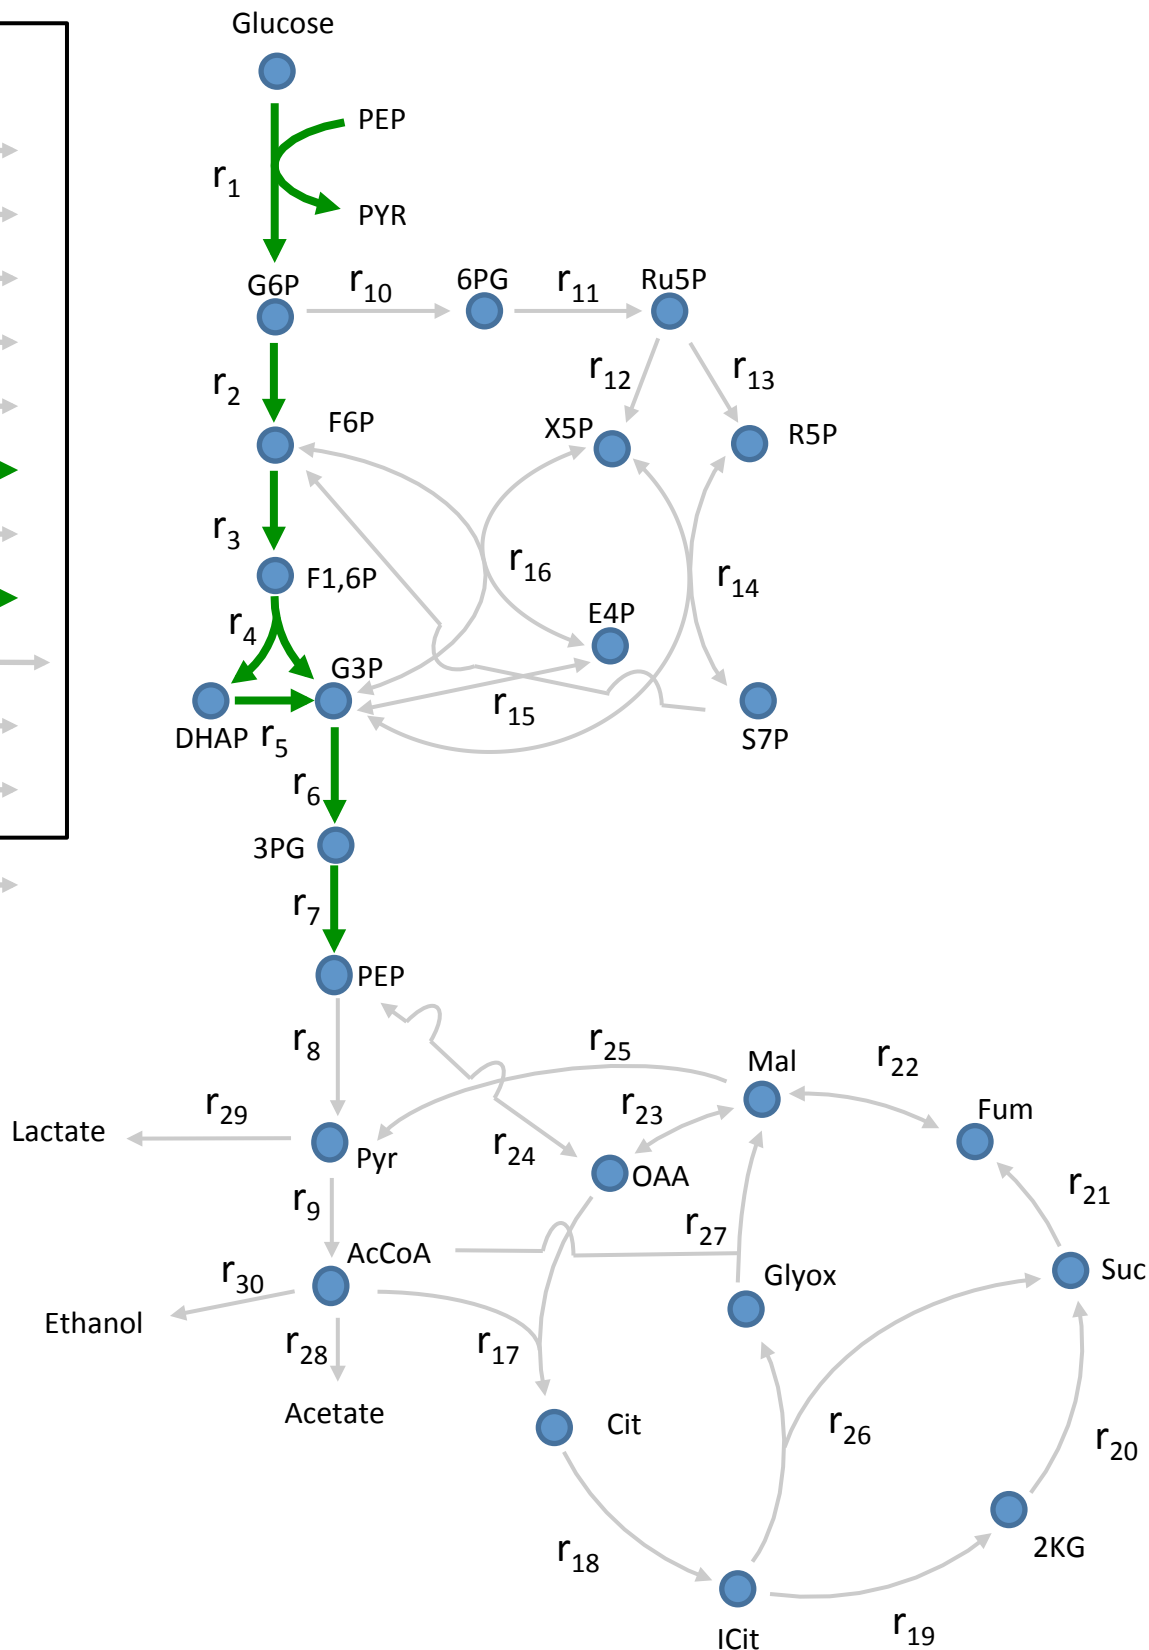

Supplement: c5mb00828j10.pdf [file c5mb00828j10.pdf]

### Cell Synthesis:

$R_{31}$ : G6P →

$R_{32}$ : F6P →

$R_{33}$ : R5P →

$R_{34}$ : E4P →

$R_{35}$ : G3P →

$R_{36}$ : 3PG →

$R_{37}$ : PEP →

$R_{38}$ : PYR →

$R_{39}$ : AcCoA →

$R_{40}$ : OAA →

$R_{41}$ : 2KG →

$R_{42}$ : CO<sub>2</sub> →

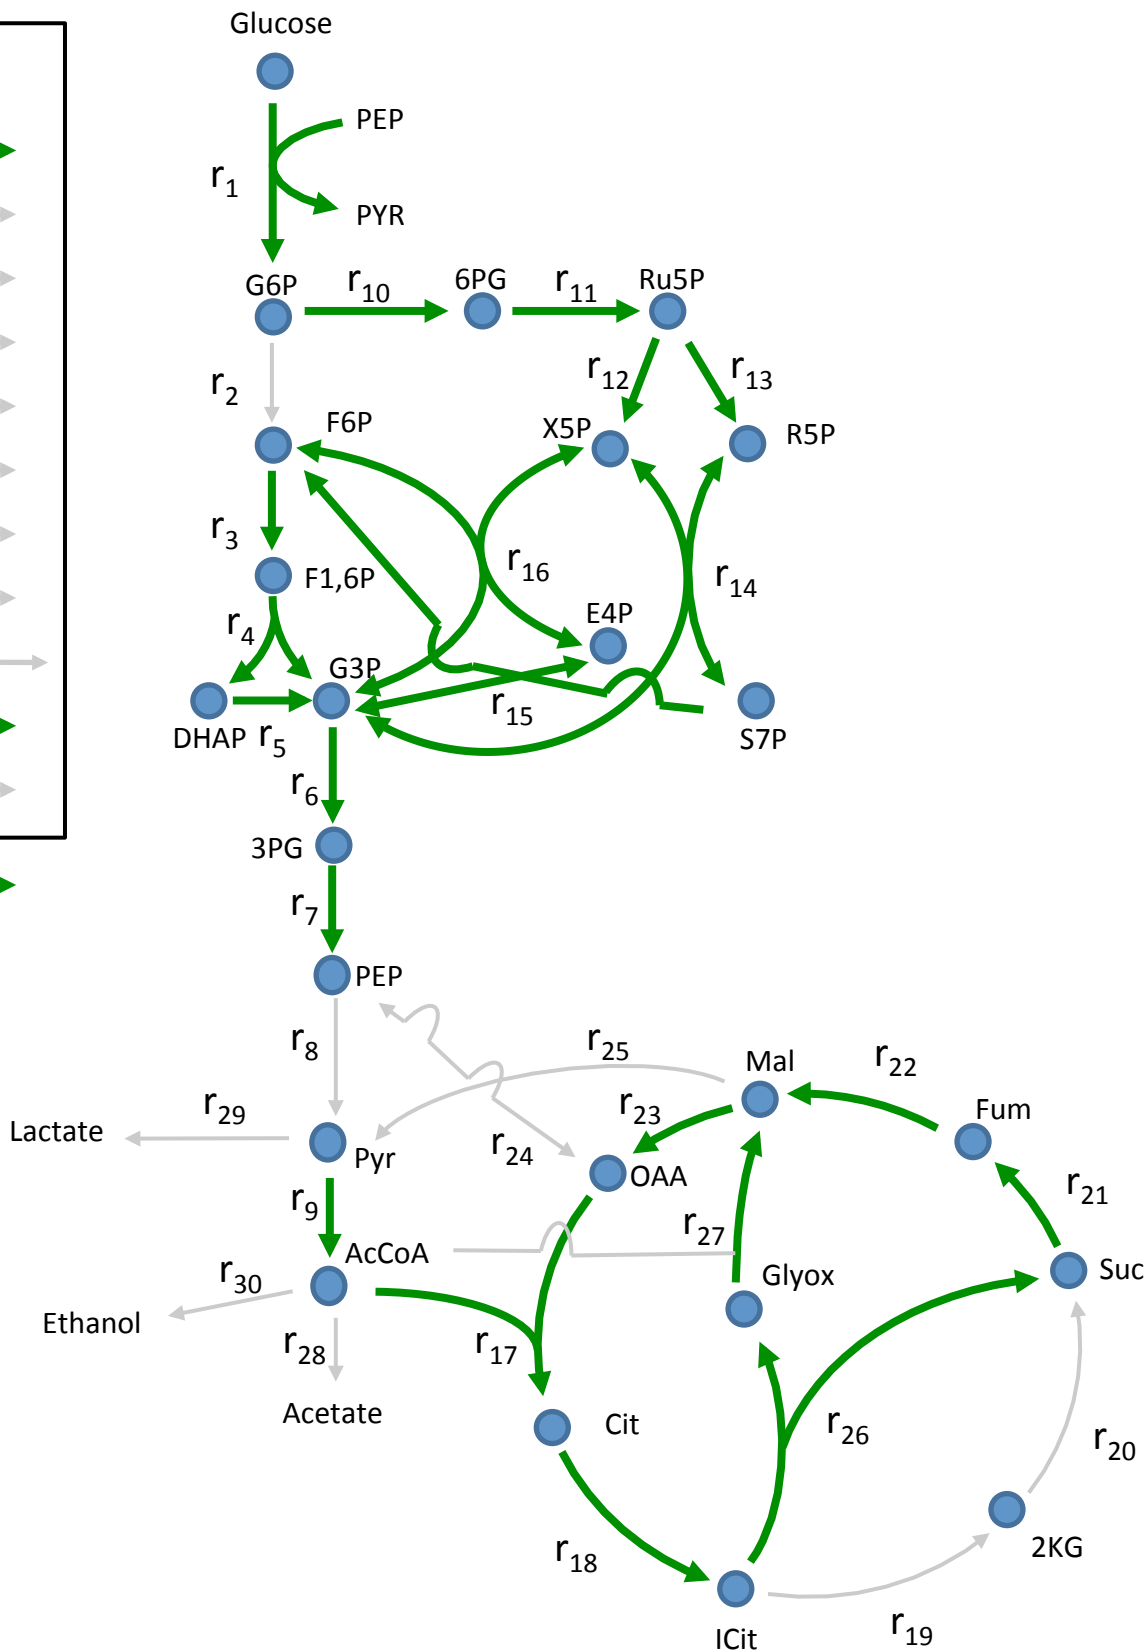

Supplement: c5mb00828j12.pdf [file c5mb00828j12.pdf]

# Principal elementary mode plot (binary)

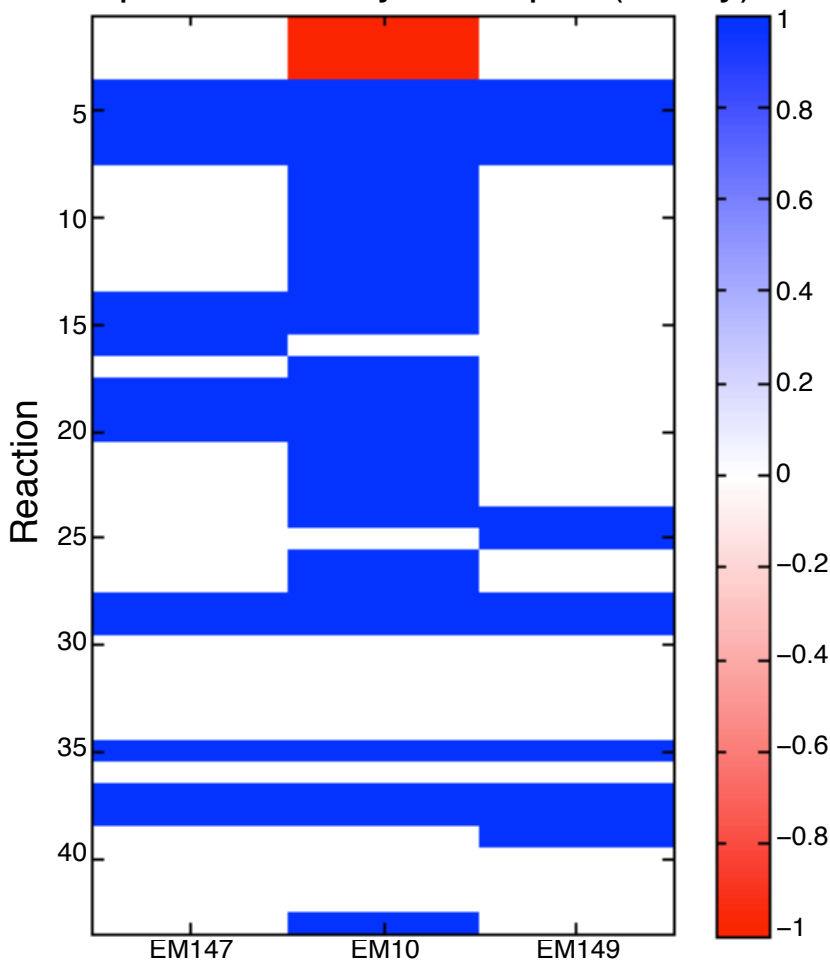

Supplement: c5mb00828j14.pdf [file c5mb00828j14.pdf]

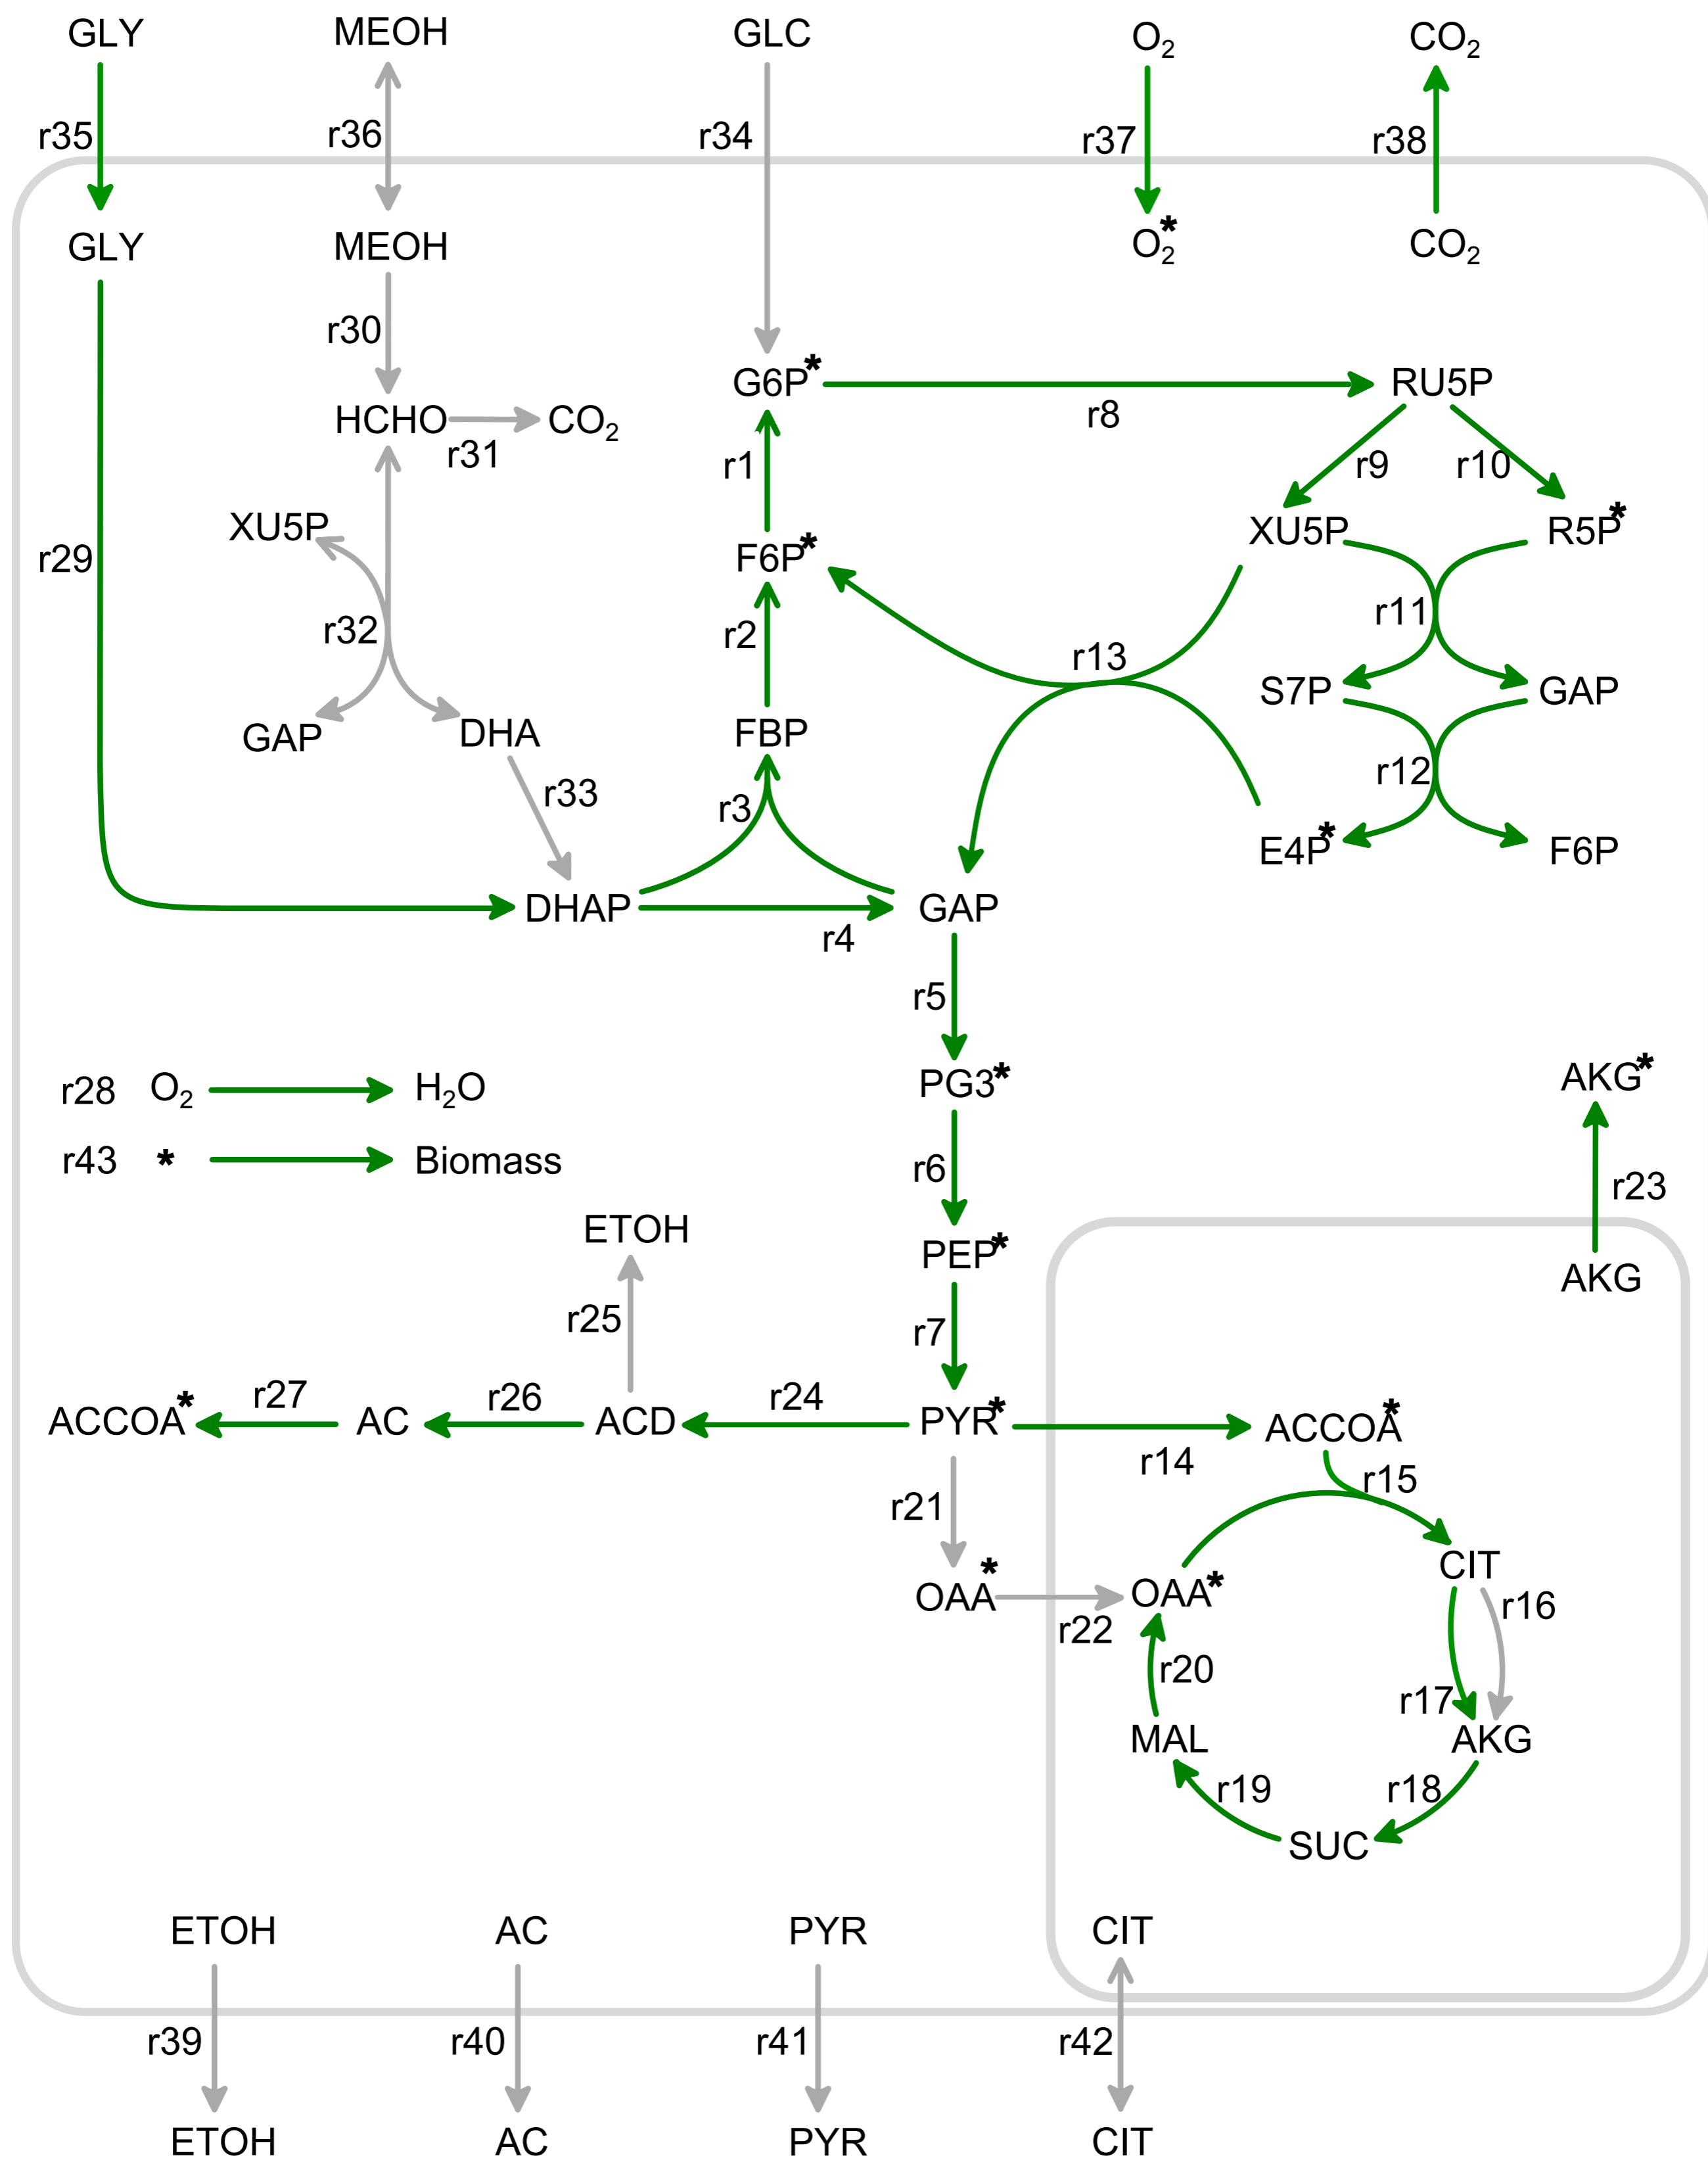

Supplement: c5mb00828j2.pdf [file c5mb00828j2.pdf]

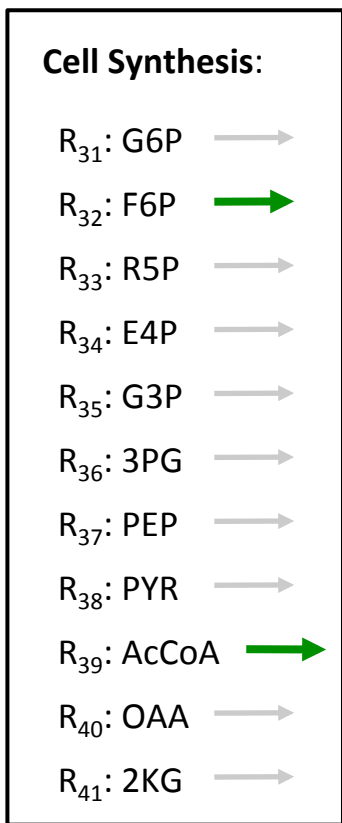

$R_{42}$ : CO2  $\rightarrow$

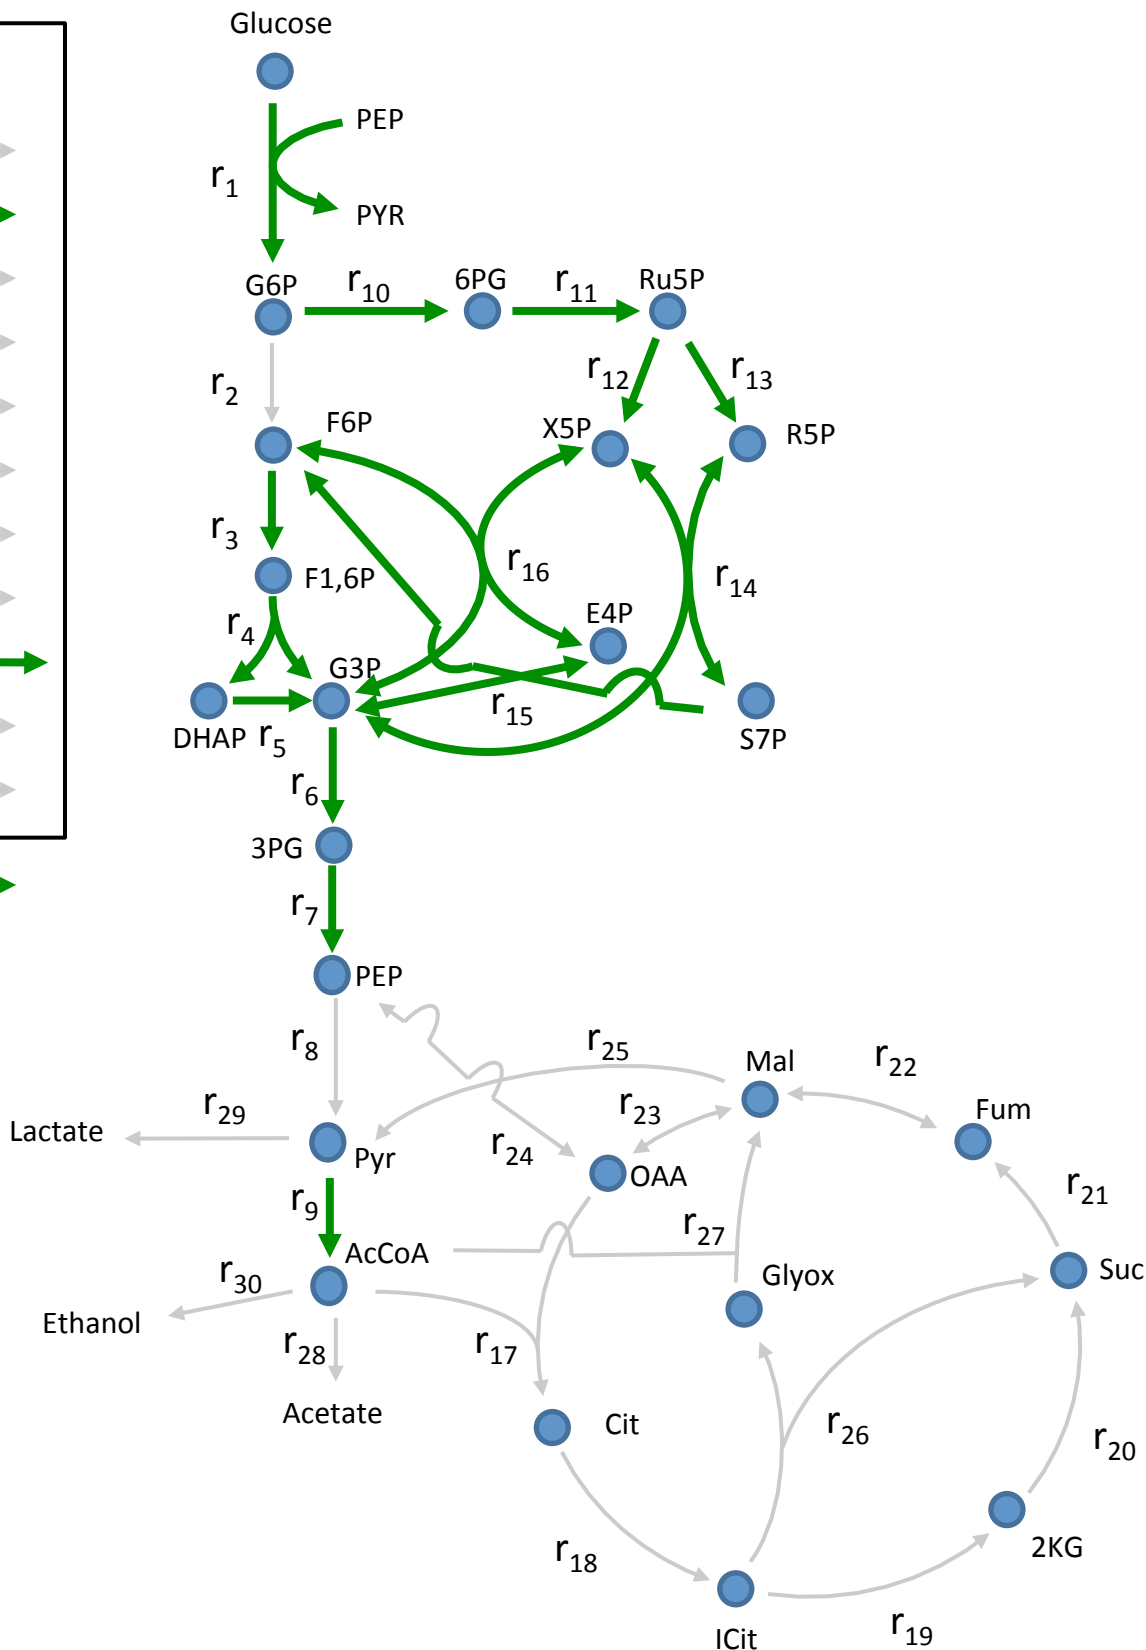

Supplement: c5mb00828j4.pdf [file c5mb00828j4.pdf]

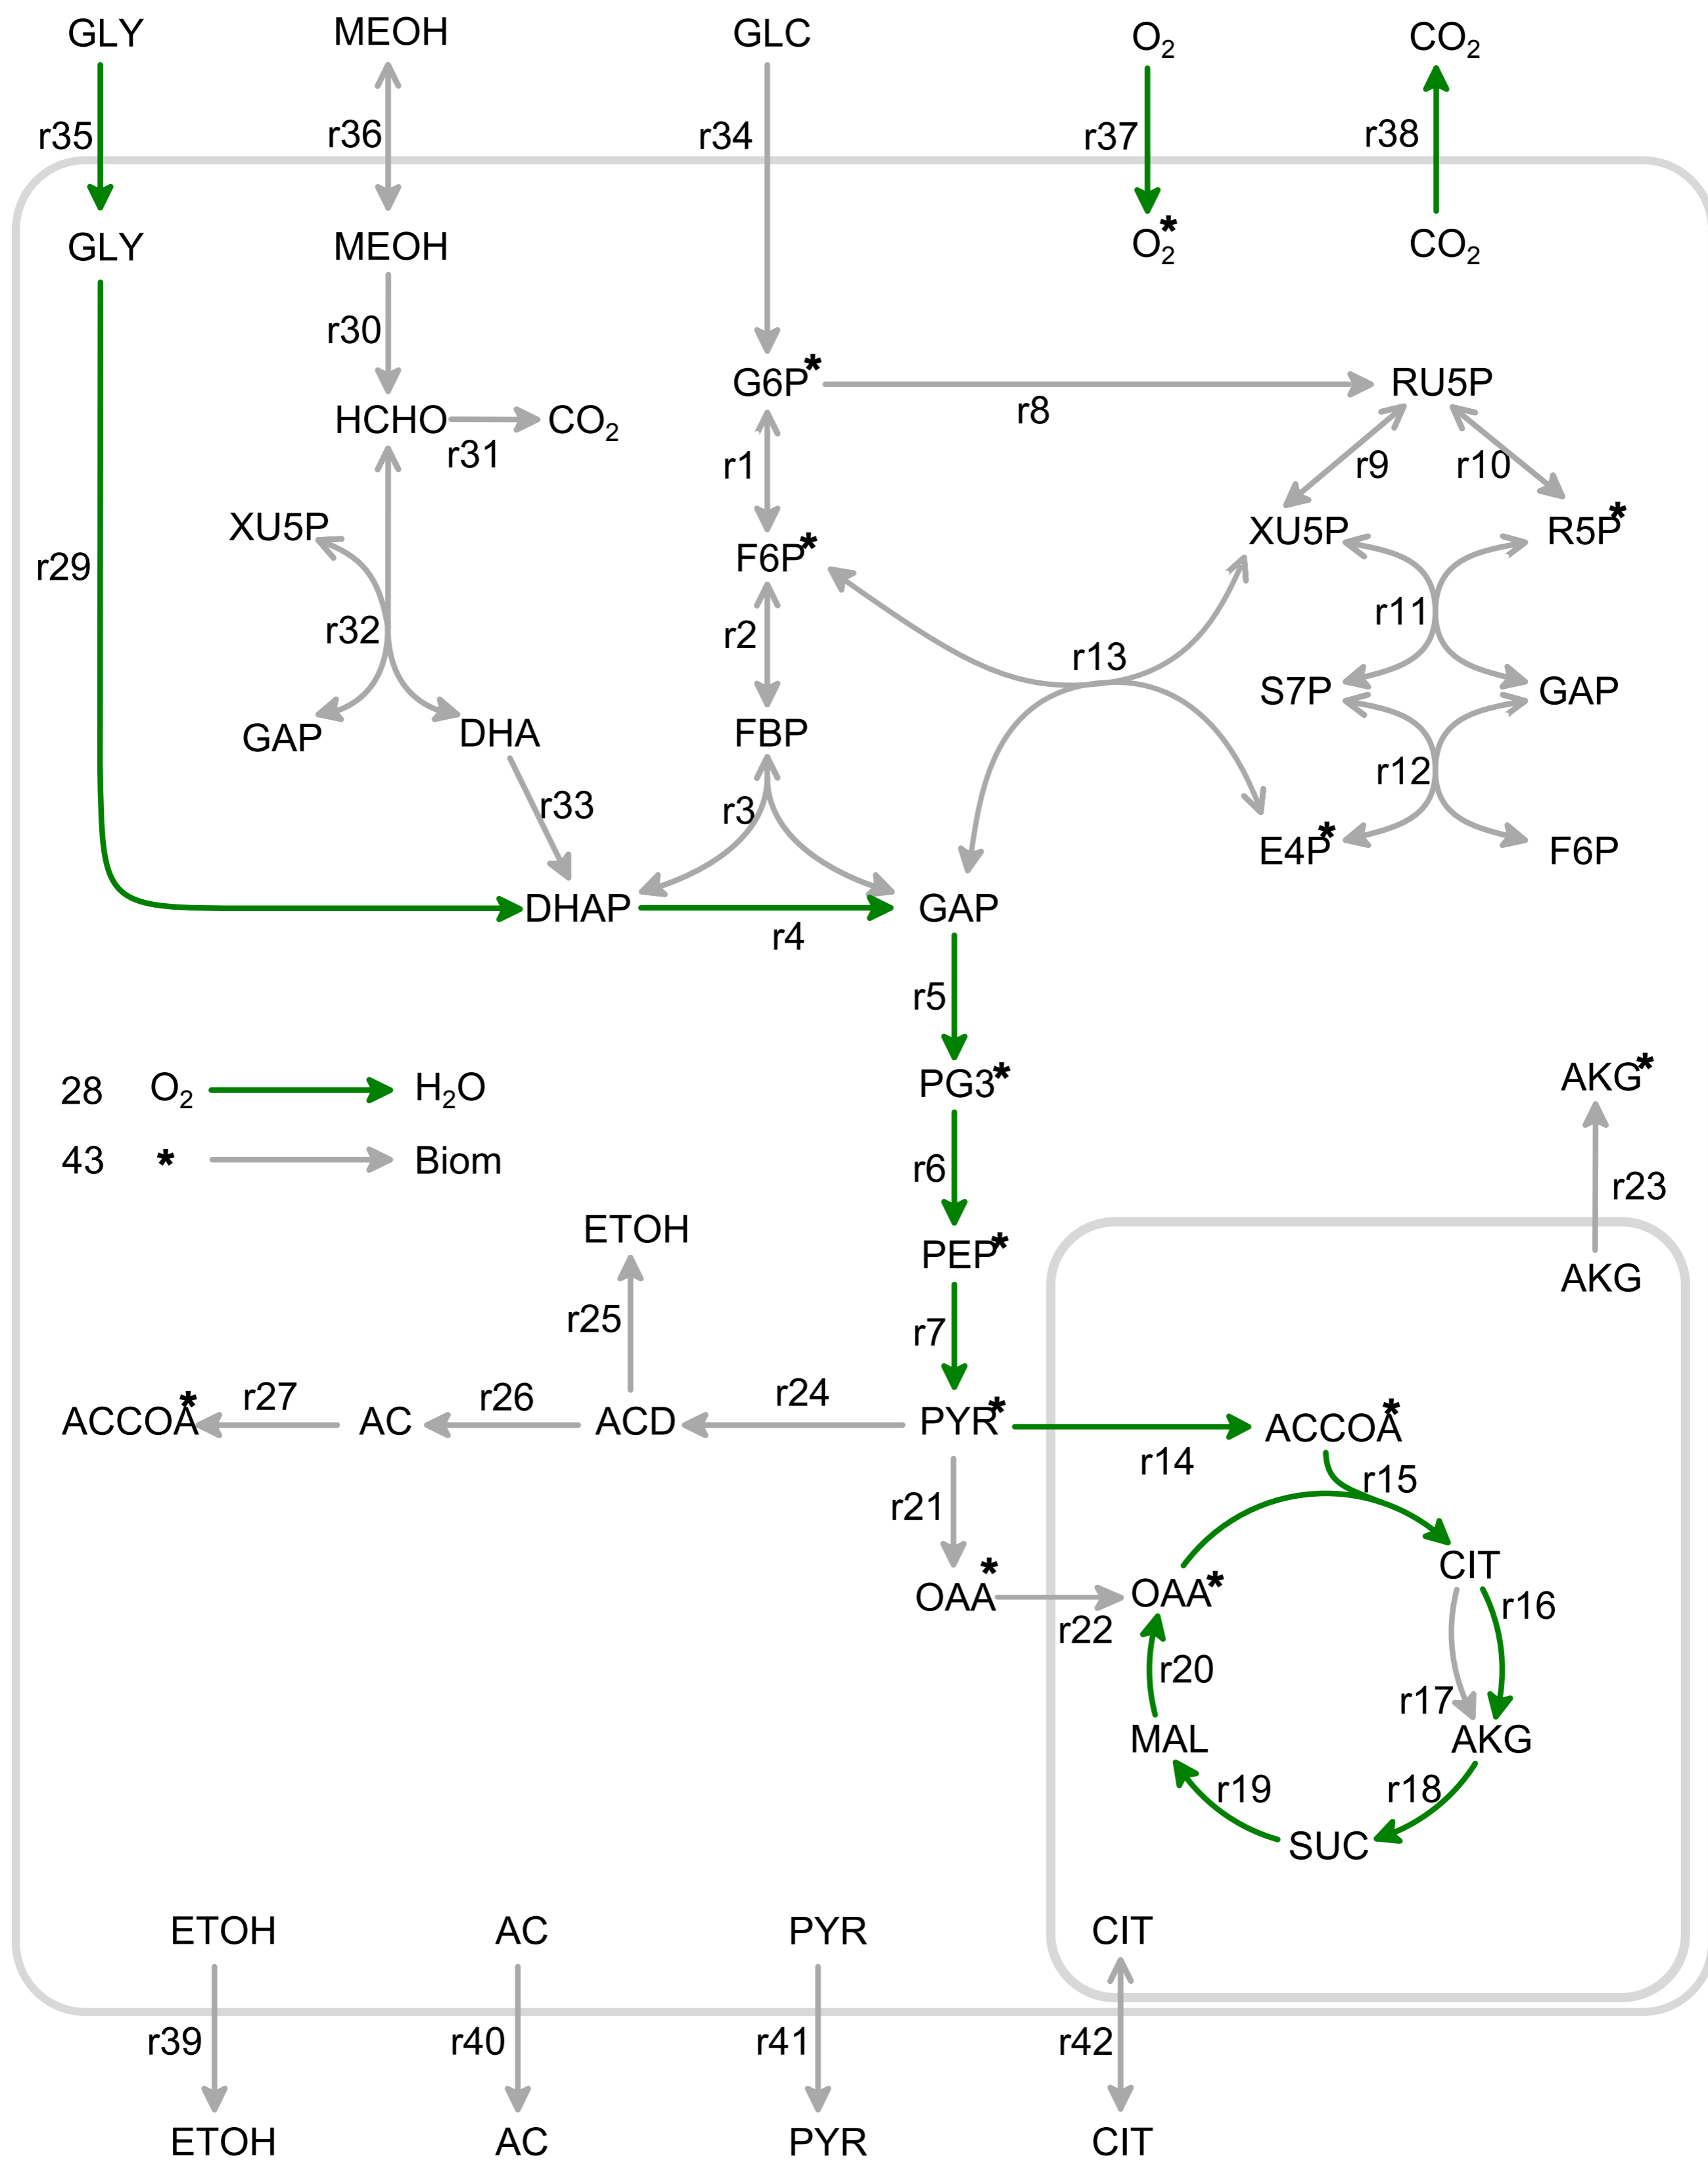

Supplement: c5mb00828j6.pdf [file c5mb00828j6.pdf]

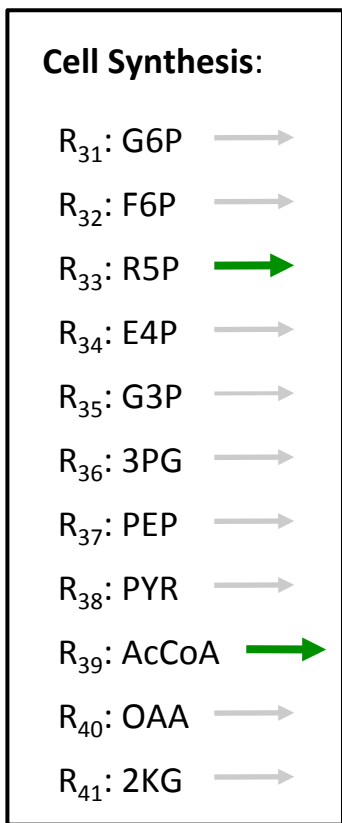

$R_{42}$ : CO2  $\rightarrow$

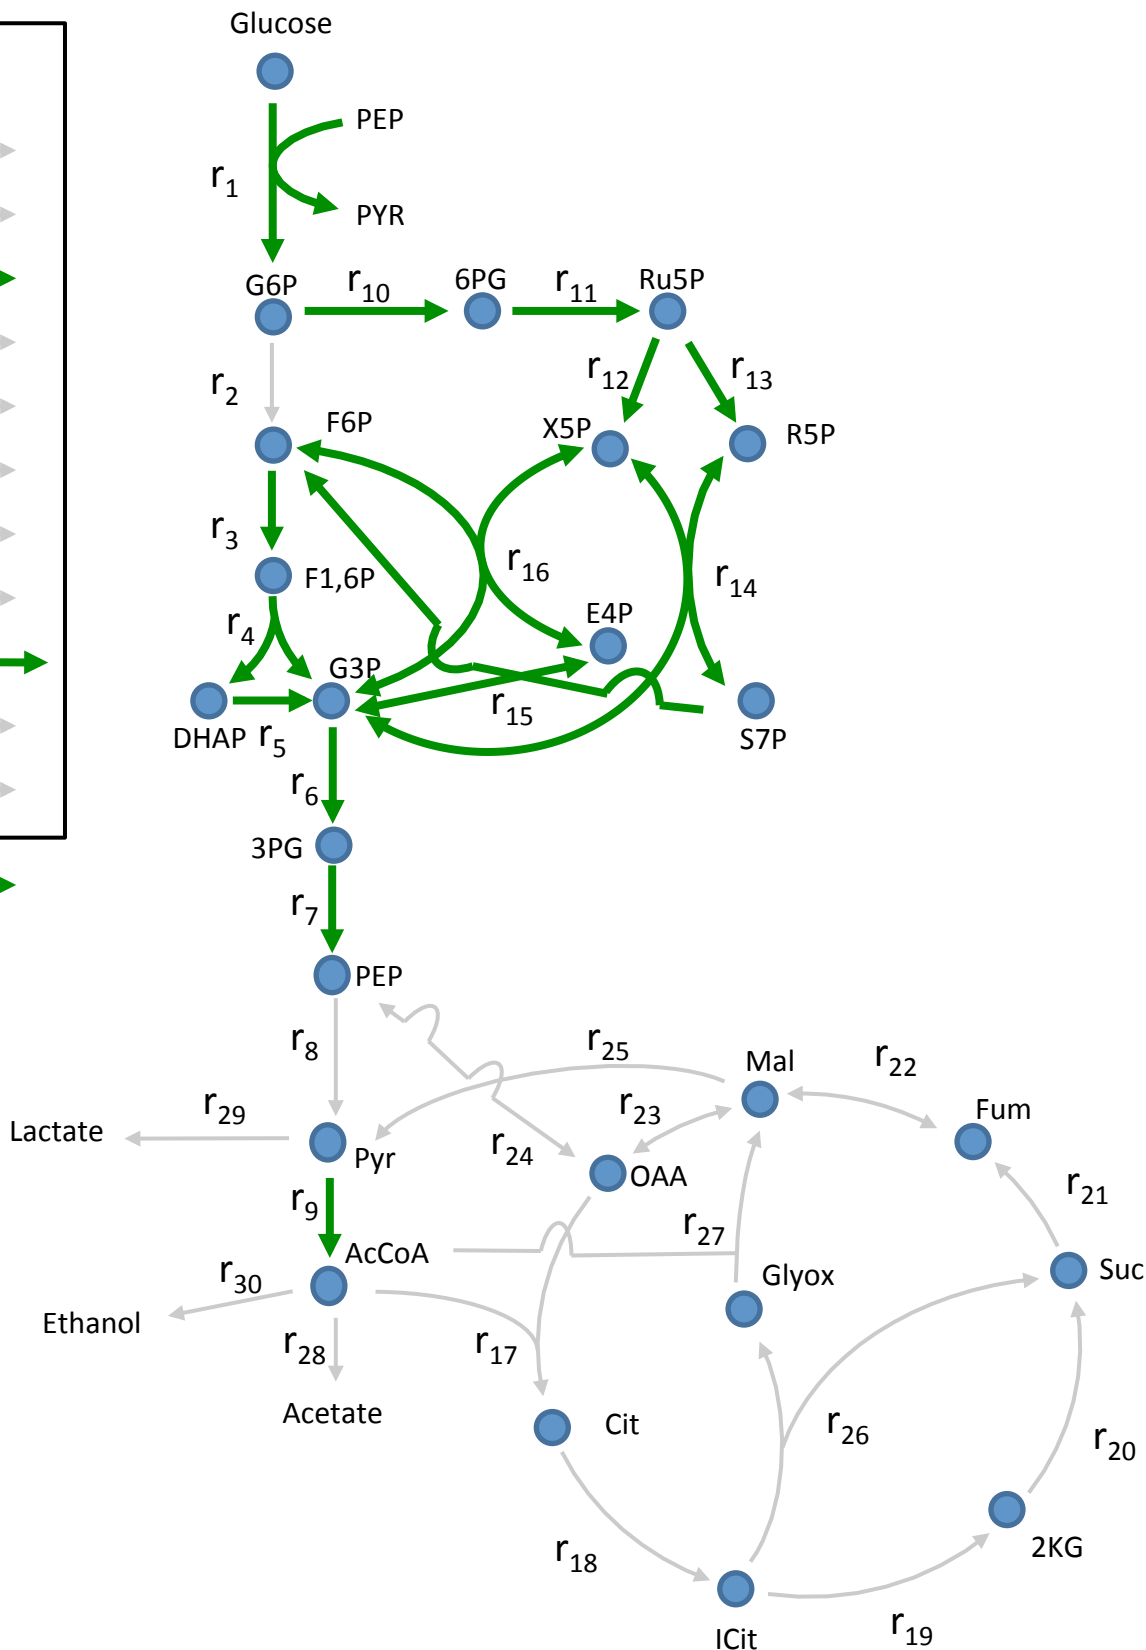

Supplement: c5mb00828j8.pdf [file c5mb00828j8.pdf]
